# Supplementary material
Source: publisher figshare collection journal article supplement (https://tandf.figshare.com/ndownloader/files/35118896)
Supplement: Supplementary file 1 [file 35118896]

**Supporting Information for**

**Virtual Screening of Potential Inhibitor Against Breast Cancer-Causing Estrogen Receptor Alpha (ERα): Molecular Docking and Dynamic Simulations**

Shabbir Muhammad,a*Afsheen Saba b, Rasheed Ahmad Khera,b Abdullah. G. Al-Sehemi,a H. Algarni,c Javed Iqbal*,b Mohammad Y. Alshahrani,d Aijaz Rasool Chaudhry,e

a Department of Chemistry, College of Science, King Khalid University, P.O. Box 9004, Abha 61413, Saudi Arabia

b Department of Chemistry, College of Science, University of Agriculture, Faisalabad, 38000, Pakistan

a Department of Physics, College of Science, King Khalid University, P.O. Box 9004, Abha 61413, Saudi Arabia

d Department of Clinical Laboratory Sciences, College of Applied Medical Sciences, King Khalid University, P.O. Box 61413, Abha, 9088, Saudi Arabia

e Department of Physics, College of Science, University of Bisha, Bisha 61922, P.O. Box 551, Saudi Arabia

Corresponding author: Shabbir Muhammad; [mshabbir@kku.edu.sa](mailto:mshabbir@kku.edu.sa), Dr. Javed Iqbal; javed.iqbal@uaf.edu.pk

**Molecular Docking**

**Docked Models/Poses for ten best docked ligands**

We calculated five (5) replica (multiple docking results) for each ligand are given in Table S1. To obtain reliable docking results, we selected those values for further analysis i.e based on nearby average binding energy, best poses, and intermolecular interactions. The preliminary results point out that, very similar results (average binding energy) were also found in ligands (L1, L3, L4, L5, L7, L10) and (L2, L6, L8, L9) showing maximum binding energy i.e studied on the basis of intermolecular interactions. The combined reproducible result from this study is perfectly suited for the identification of potential inhibitor against ERα of breast cancer. Interaction Figs (2D and 3D) L1, L3, L4, L5, L7, L9, L10 are shown in S1, S2, S3, S4, S5, S6 and S7. Polar and non-polar interactions of L1, L3, L4, L5, L7 L9 and L10 are display in Fig.S8.

**Table S1**. Five replica (different multiple docking results) and average binding energy for best docked ligands (**L1**-**L10**).

| **Remark Vina Results**  **Average Binding energy (kcal/mol)**  **(Auto Dock Vina)** | | | | | | |
| --- | --- | --- | --- | --- | --- | --- |
| **Ligands** | **Replica (Multiple Docking Results)** | | | | | |
|  | **Replica 1** | **Replica 2** | **Replica 3** | **Replica 4** | **Replica 5** | **Average Binding Energy** |
| **L1** | -7.8 | -7.6 | -7.5 | **-7.4** | -7.4 | -7.4 |
| **L2** | **-8.6** | -7.9 | -8.3 | -8 | -8 | -8.1 |
| **L3** | -7.2 | -7.5 | -7.4 | **-7.5** | -7.4 | -7.5 |
| **L4** | -7.6 | -7.6 | **-7.5** | -7.6 | -7.5 | -7.5 |
| **L5** | -7.1 | -7.4 | -7.0 | -8.4 | **-7.4** | -7.4 |
| **L6** | -8.2 | **-8.8** | -8.2 | -8.3 | -8.2 | -8.3 |
| **L7** | -8.4 | -8.2 | -7.6 | -8.4 | **-8.2** | -8.2 |
| **L8** | -8.8 | -8.4 | -8.0 | **-9.0** | -8.4 | -8.5 |
| **L9** | -7.1 | -7.0 | -7.0 | -7.0 | **-7.4** | -7.12 |
| **L10** | -7.5 | -7.0 | -7.4 | **-7.4** | -7.5 | -7.4 |

**Dimension of Site Specific grid box**

**Replica 1.** The dimensions of grid box were set as x = 54 Å, y = 71 Å, z = 54 Å and the grid center dimensions were set as x = 19, y = -0.45 , z = 17 with the default exhaustiveness value of 8.

**Replica 2.** The dimensions of grid box were set as x = 50 Å, y = 69 Å, z = 50 Å and the grid center dimensions were set as x = 20, y = -0.47, z = 18 with the default exhaustiveness value of 8.

**Replica 3.** The dimensions of grid box were set as x = 53 Å, y = 74 Å, z = 53 Å and the grid center dimensions were set as x = 18, y = -0.64 , z = 16 with the default exhaustiveness value of 8.

**Replica 4.** The dimensions of grid box were set as x = 58 Å, y = 70 Å, z = 58 Å and the grid center dimensions were set as x = 20, y = -0.79, z = 18 with the default exhaustiveness value of 8.

**Replica 5.** The dimensions of grid box were set as x = 56 Å, y = 73 Å, z = 56 Å and the grid center dimensions were set as x = 18, y = -0.69, z = 19 with the default exhaustiveness value of 8.

Protein-Ligand Interactions

The ligand L1 shows only one hydrogen bond with the amino acid residue of GLU380 having a bond length of 3.49 Å. Interestingly, there are seen twelve hydrophobic interactions among ligand L1 and other residues of ERα protein having bond distances as low as 3.65 Å for TRP383and as large as *5.*45Å for LEU525. Most of the hydrophobic interactions involve Leucine residues, which are very hydrophobic amino acids in their structural nature. The ligand **L3** shows two hydrogen bonds with the amino acid residues of ASN519 and THR347 having bond lengths of 2.58 Å and 3.42 Å, respectively. Interestingly, there are seen six hydrophobic interactions among ligand **L3** and other residues of ERα protein having bond distances as low as 3.61 Å for LEU525 and as large as 5.09 Å for ALA350. Most of the hydrophobic interactions involve Leucine and Alanine residues, which are very hydrophobic amino acid residues in their structural nature. The ligand **L4** shows only two hydrophobic interactions with the amino residues of TRP383 and LYS529 having bond lengths of 4.79 Å and 4.61 Å, respectively.

The ligand **L5** shows four hydrophobic interactions with the amino acid residues of (2) TRP383, LEU356, and LYS529. However, there are seen four hydrophobic interactions among ligand **L5** and the residues of ERα protein having bond distances as low as 4.27 Å for LEU356 and as large as 5.08 Å for TRP383. Most of the hydrophobic interactions involve Tryptophan residues, which are very hydrophobic amino acids in their structural nature. Interestingly, there are seen seven hydrophobic interactions among ligand **L7** and the residues of ERα protein having bond distances as low as 4.14 Å for LEU525 and as large as 5.40 Å for LEU346. Amazingly, most of the hydrophobic interactions involve Leucine residues, which are very hydrophobic amino acids in their structural nature. Interestingly, there are seen five hydrogen bonds among ligand **L9** and the residues of ERα protein having bond distances as low as 2.05 Å and as large as 3.44 Å. The ligand **L10** shows only one hydrogen bond with the amino acid residue of ALA382 having a bond length of 2.73 Å. Interestingly, there are seen eleven hydrophobic interactions among ligand **L10** and other residues of ERα protein having bond distances as low as 3.75 Å and as large as 5.44 Å. Most of the hydrophobic interactions involve Leucine residues, which are very hydrophobic amino acids in their structural nature.


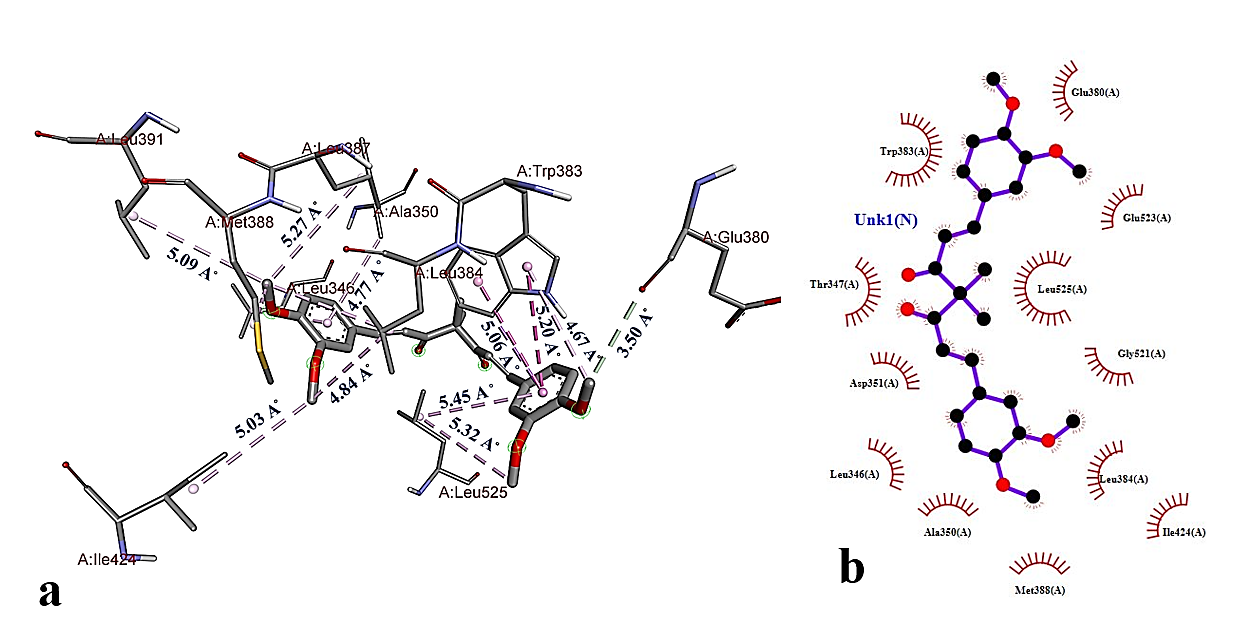


**Fig. S1.** Molecular docking interactions of curcumin ligand (L1) against human estrogen receptor alpha (ERα) responsible for breast cancer. **(a)** 3D model of the interaction between ligand (L1) and (ERα-3ERT). (**b)** Ligplot schematic 2D representation of docked ligand (L1) into the binding cavity of ERα. No hydrogen bond was formed, spoked red arcs indicate hydrophobic contracts, atoms are shown in black for carbon, blue for nitrogen, green for fluorine, and red represents oxygen.

**Fig. S2.** Molecular docking interactions of curcumin ligand (L3) against human estrogen receptor alpha (ERα) responsible for breast cancer. **(a)** 3D model of the interaction between ligand (L3) and (ERα-3ERT). (**b)** Ligplot schematic 2D representation of docked ligand (L3) into the binding cavity of ERα. No hydrogen bond was formed, spoked red arcs indicate hydrophobic contracts, atoms are shown in black for carbon, blue for nitrogen, green for fluorine, and red represents oxygen.


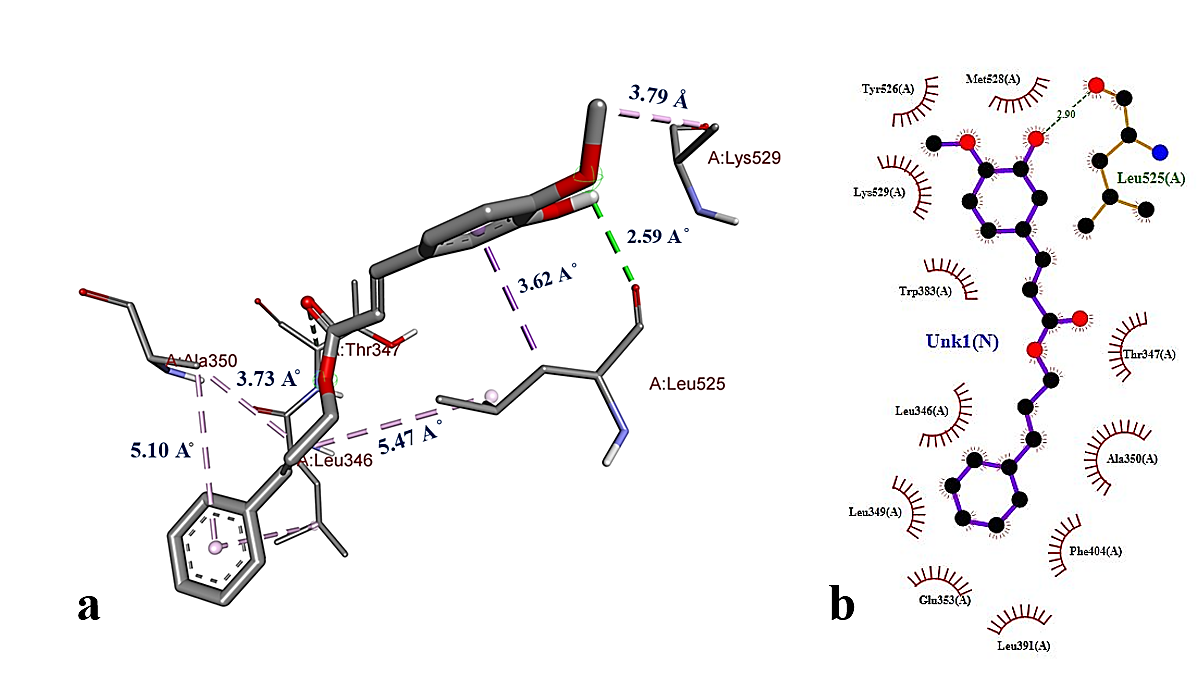

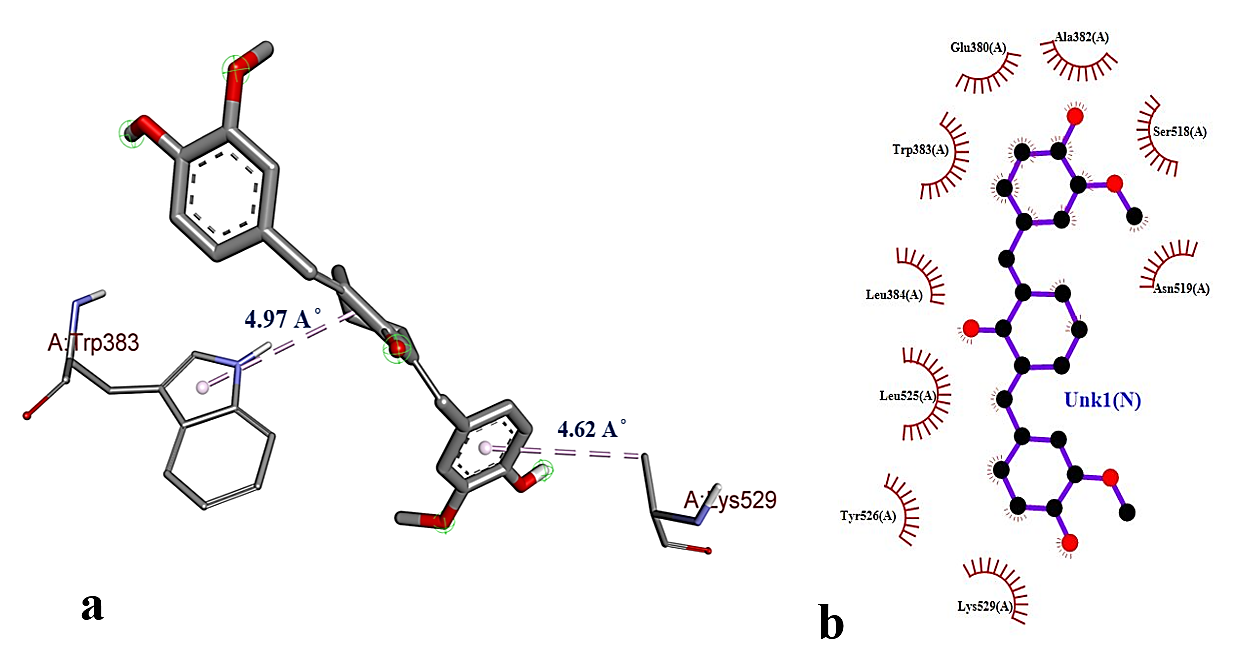


**Fig. S3.** Molecular docking interactions of curcumin ligand (L4) against human estrogen receptor alpha (ERα) responsible for breast cancer. **(a)** 3D model of the interaction between ligand (L4) and (ERα-3ERT). (**b)** Ligplot schematic 2D representation of docked ligand (L4) into the binding cavity of ERα. No hydrogen bond was formed, spoked red arcs indicate hydrophobic contracts, atoms are shown in black for carbon, blue for nitrogen, green for fluorine, and red represents oxygen.


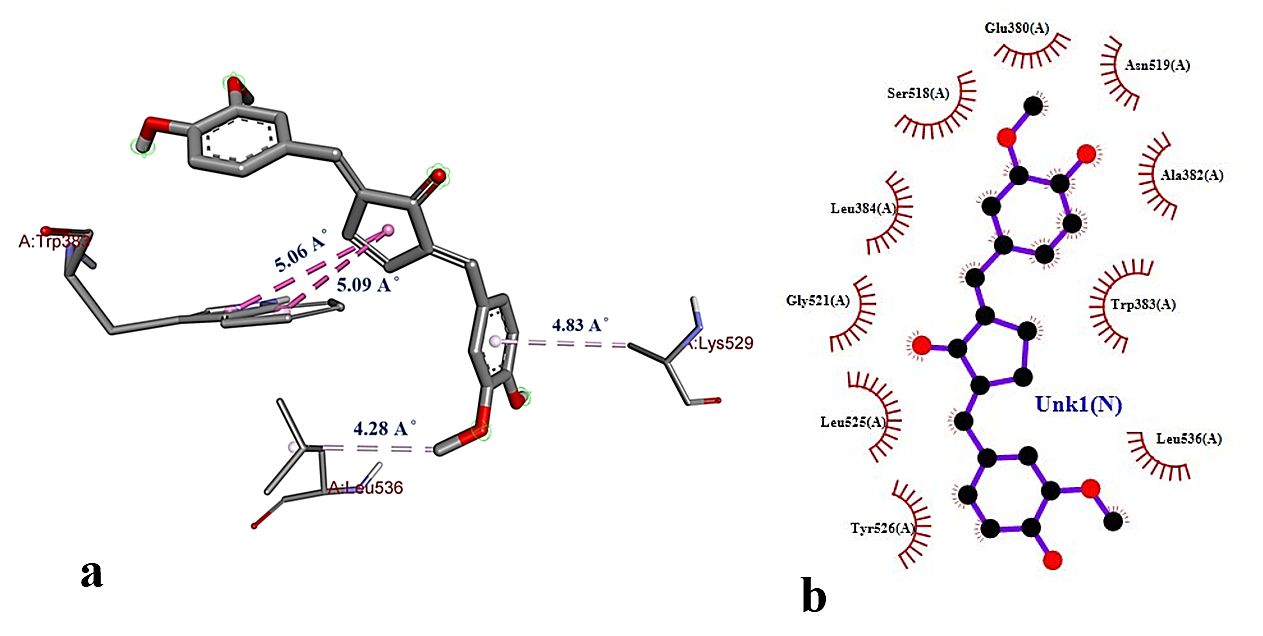


**Fig. S4.** Molecular docking interactions of curcumin ligand (L5) against human estrogen receptor alpha (ERα) responsible for breast cancer. **(a)** 3D model of the interaction between ligand (L5) and (ERα-3ERT). (**b)** Ligplot schematic 2D representation of docked ligand (L5) into the binding cavity of ERα. No hydrogen bond was formed, spoked red arcs indicate hydrophobic contracts, atoms are shown in black for carbon, blue for nitrogen, green for fluorine, and red represents oxygen.

**Fig S5.** Molecular docking interactions of curcumin ligand (L7) against human estrogen receptor alpha (ERα) responsible for breast cancer. **(a)** 3D model of the interaction between ligand (L7) and (ERα-3ERT). (**b)** Ligplot schematic 2D representation of docked ligand (L7) into the binding cavity of ERα. No hydrogen bond was formed, spoked red arcs indicate hydrophobic contracts, atoms are shown in black for carbon, blue for nitrogen, green for fluorine, and red represents oxygen.


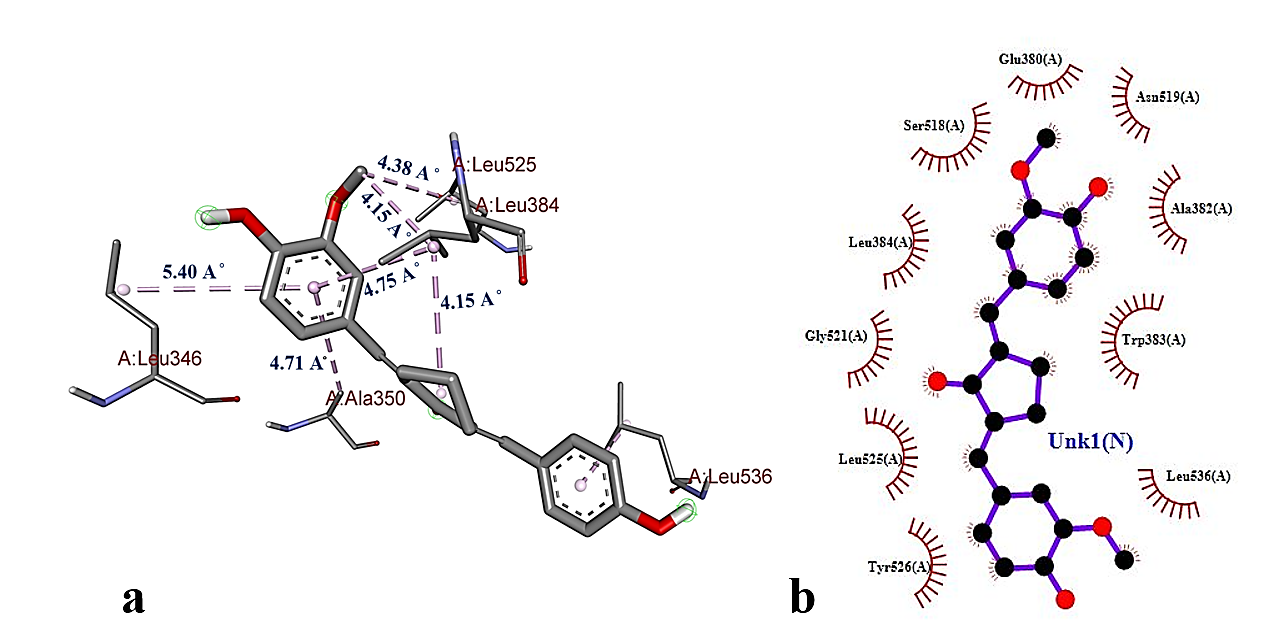

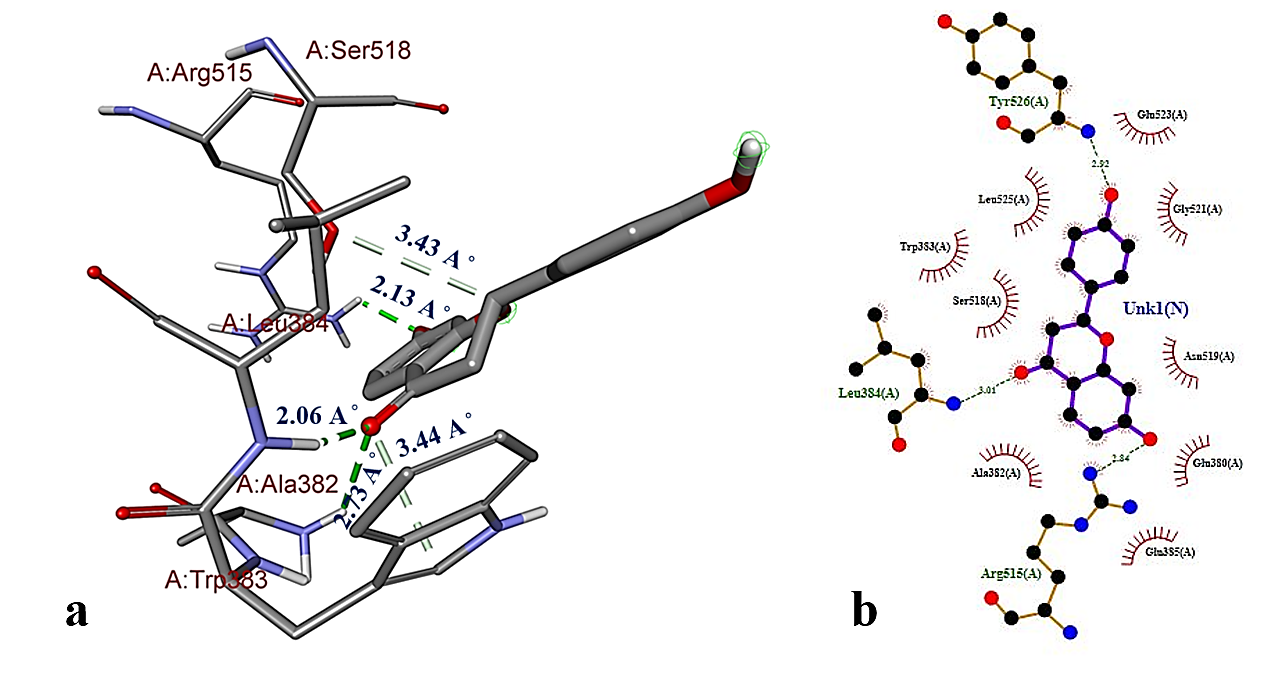


**Fig. S6.** Molecular docking interactions of curcumin ligand (L9) against human estrogen receptor alpha (ERα) responsible for breast cancer. **(a)** 3D model of the interaction between ligand (L9) and (ERα-3ERT). (**b)** Ligplot schematic 2D representation of docked ligand (L9) into the binding cavity of ERα. No hydrogen bond was formed, spoked red arcs indicate hydrophobic contracts, atoms are shown in black for carbon, blue for nitrogen, green for fluorine, and red represents oxygen.


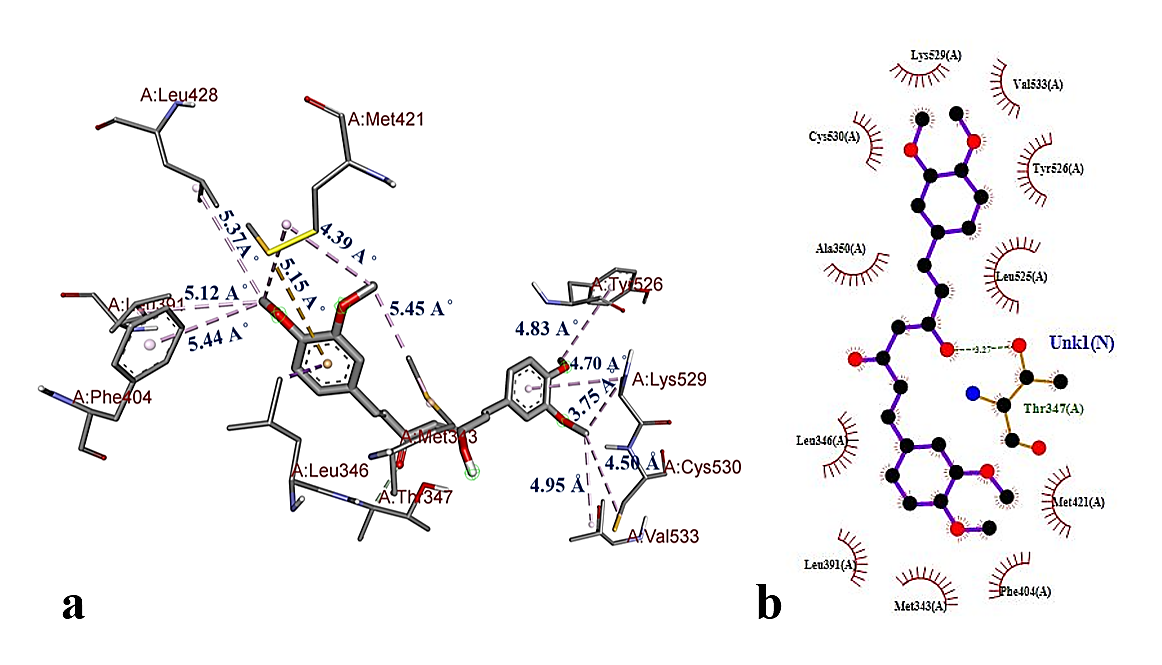


**Fig. S7.** Molecular docking interactions of curcumin ligand (L10) against human estrogen receptor alpha (ERα) responsible for breast cancer. **(a)** 3D model of the interaction between ligand (L10) and (ERα-3ERT). (**b)** Ligplot schematic 2D representation of docked ligand (L10) into the binding cavity of ERα. No hydrogen bond was formed, spoked red arcs indicate hydrophobic contracts, atoms are shown in black for carbon, blue for nitrogen, green for fluorine, and red represents oxygen.


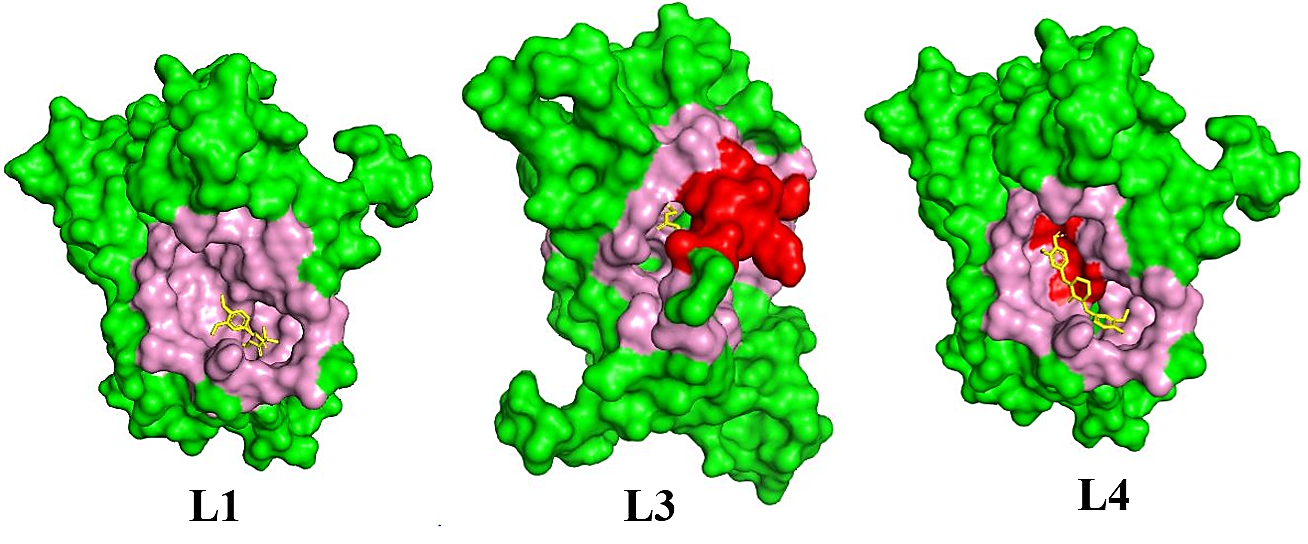

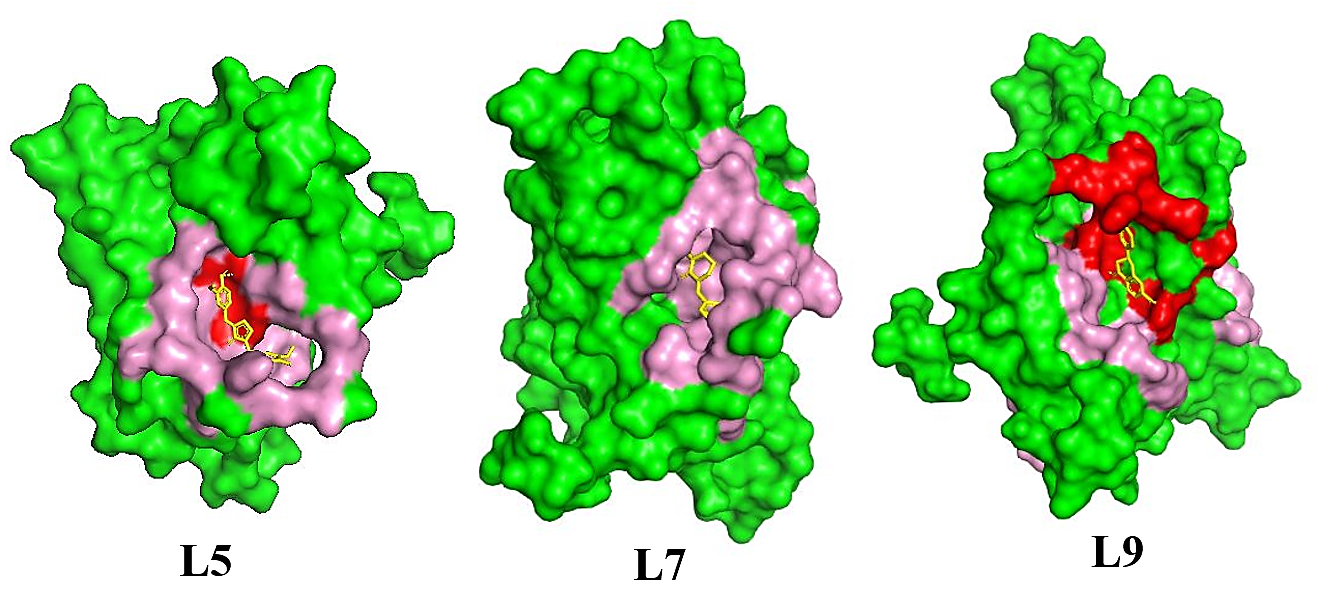

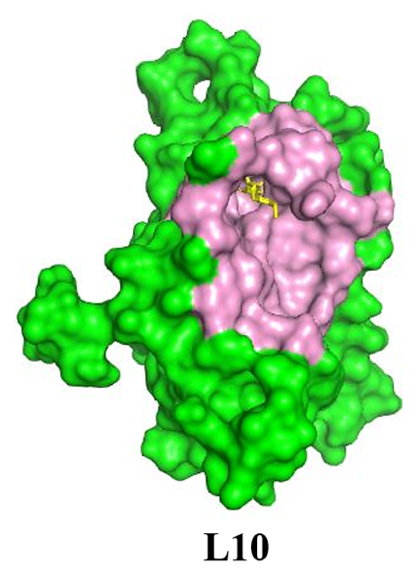


**Fig. S8.** Polar and non-polar interactions of best docked ligands (L1, L3, L4, L5, L7, L9 and L10). Green area represents entire protein surface, red region shows polar and pink area for nonpolar**.**


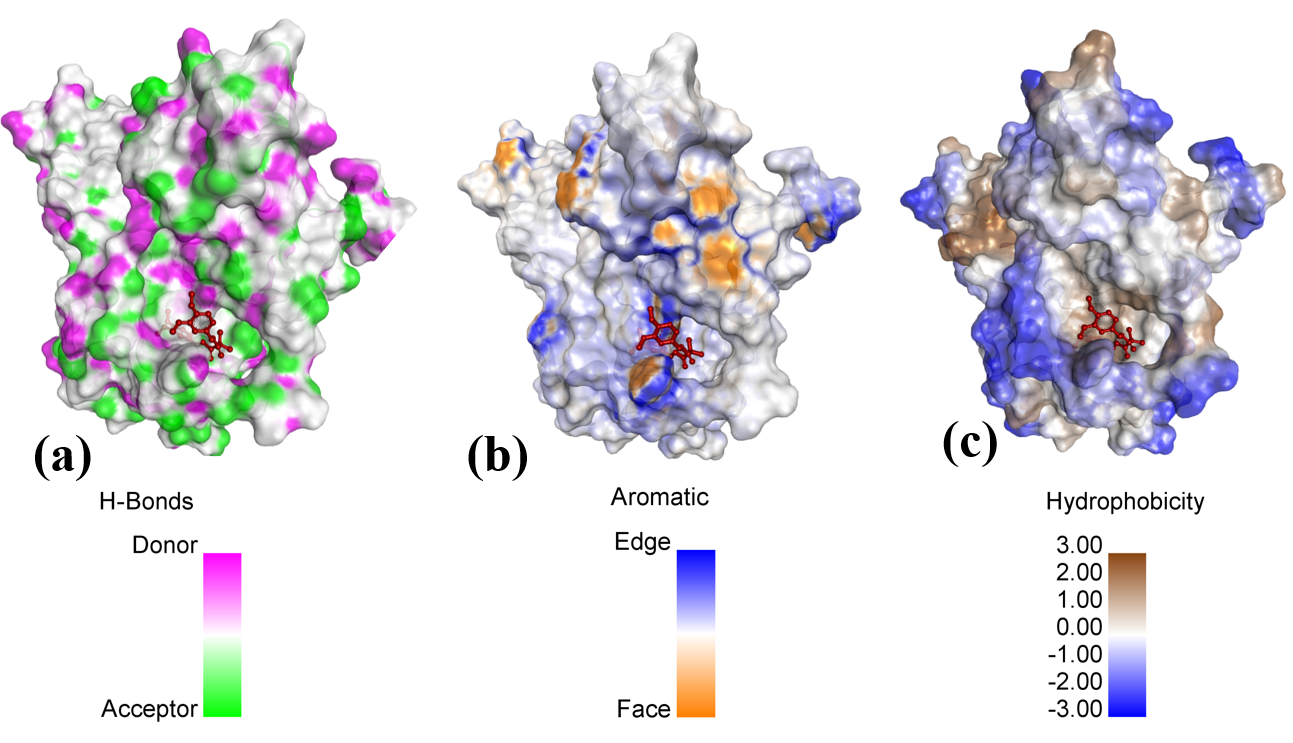

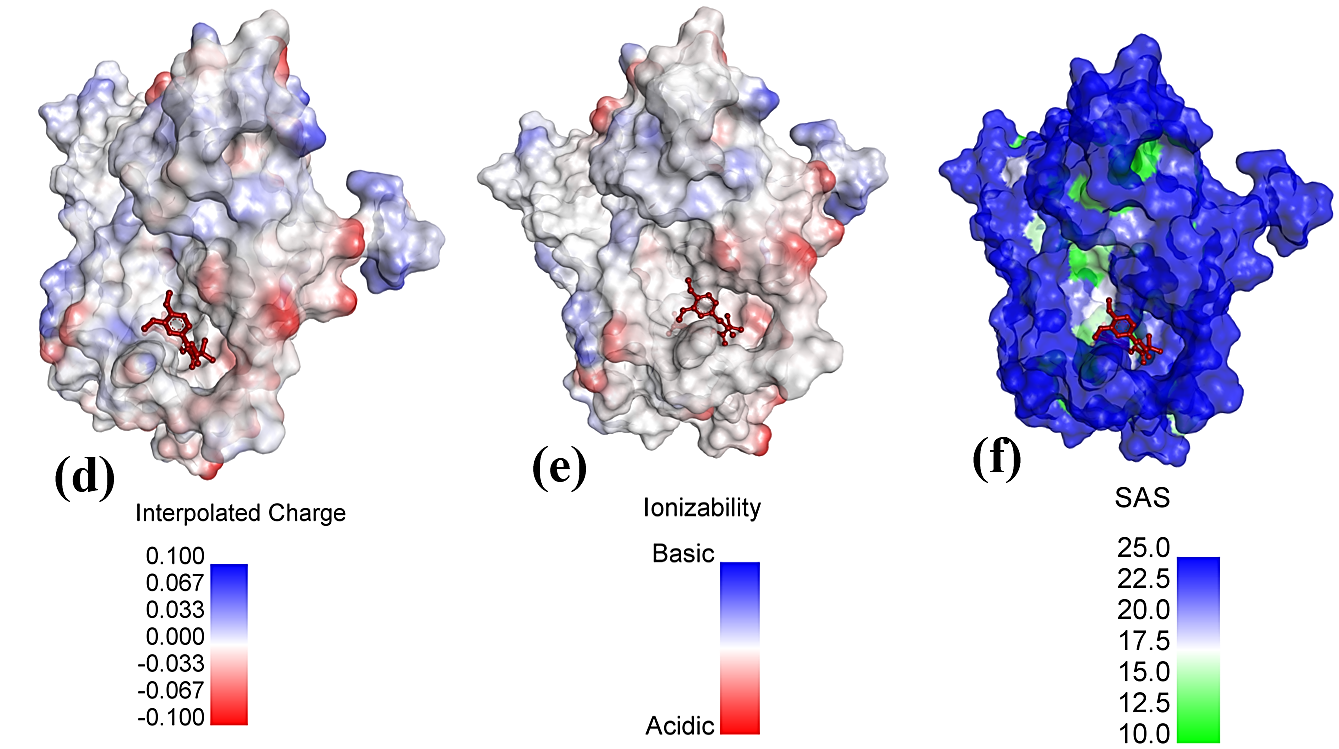


**Fig. S9.** Total density surface of docked ligand L1 with cavity of ERα of breast cancer. Hydrogen bond donor and acceptor mesh represented by pink and green colors **(a).** Surface representation of Aromatic and hydrophobic, pockets represented with blue and brown color **(c, d).** Interpolated charges and ionizability pockets as shown in blue and red color **(d, e).** SAS (Total solvent accessible) express in blue and green color **(f).**


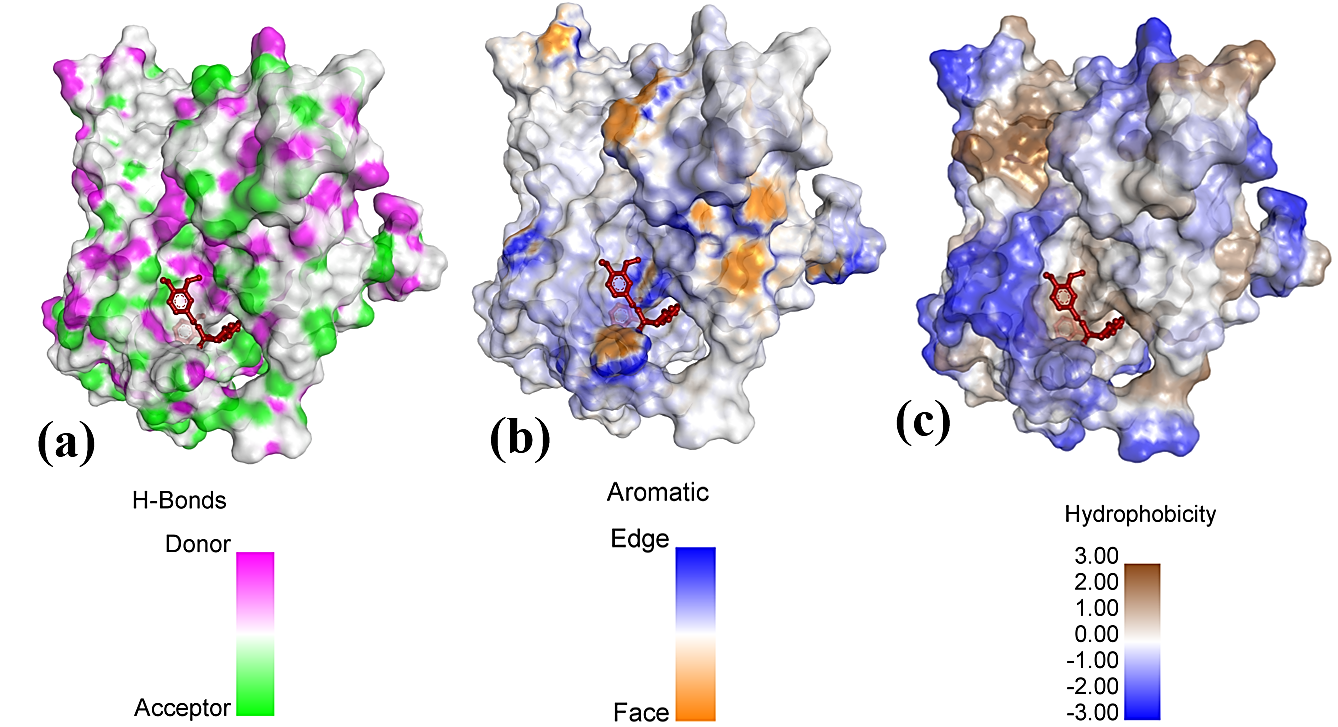

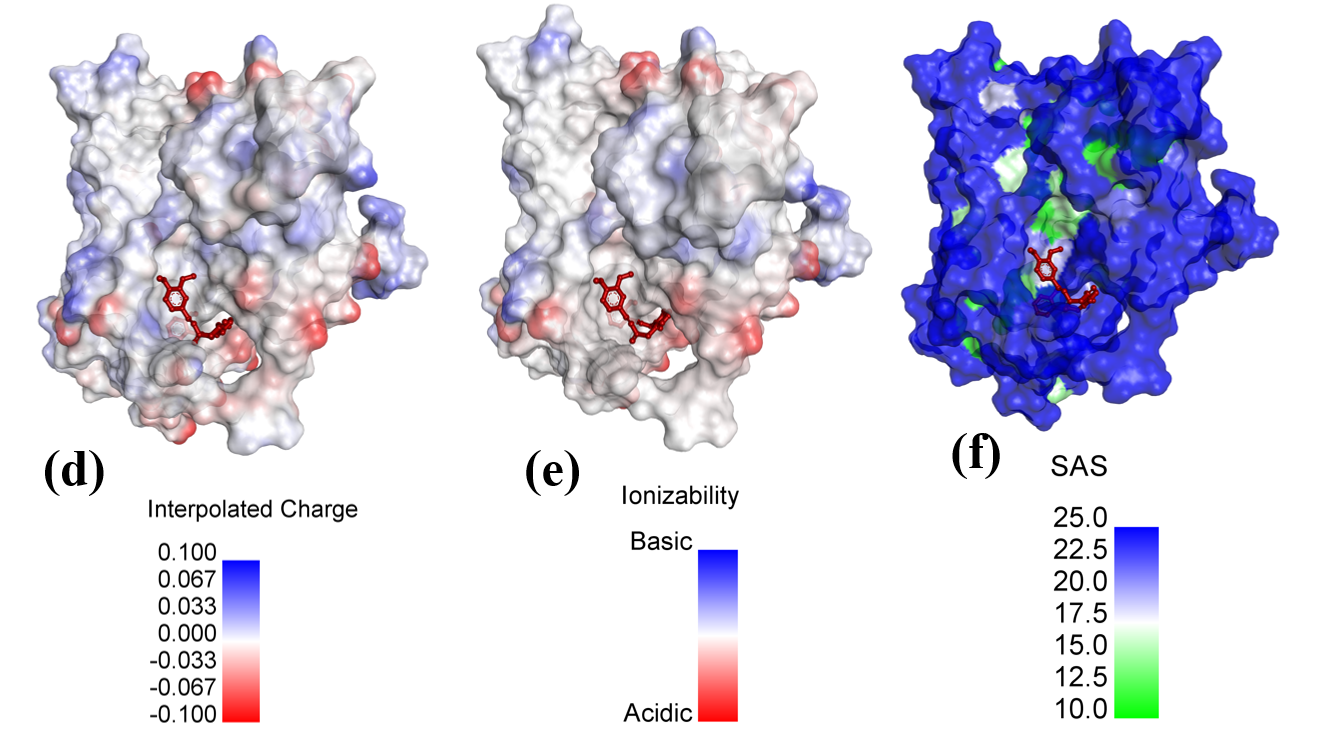


**Fig. S10.** Total density surface of docked ligand L2 with cavity of ERα of breast cancer. Hydrogen bond donor and acceptor mesh represented by pink and green colors **(a).** Surface representation of Aromatic and hydrophobic, pockets represented with blue and brown color **(c, d).** Interpolated charges and ionizability pockets as shown in blue and red color **(d, e).** SAS (Total solvent accessible) express in blue and green color **(f).**


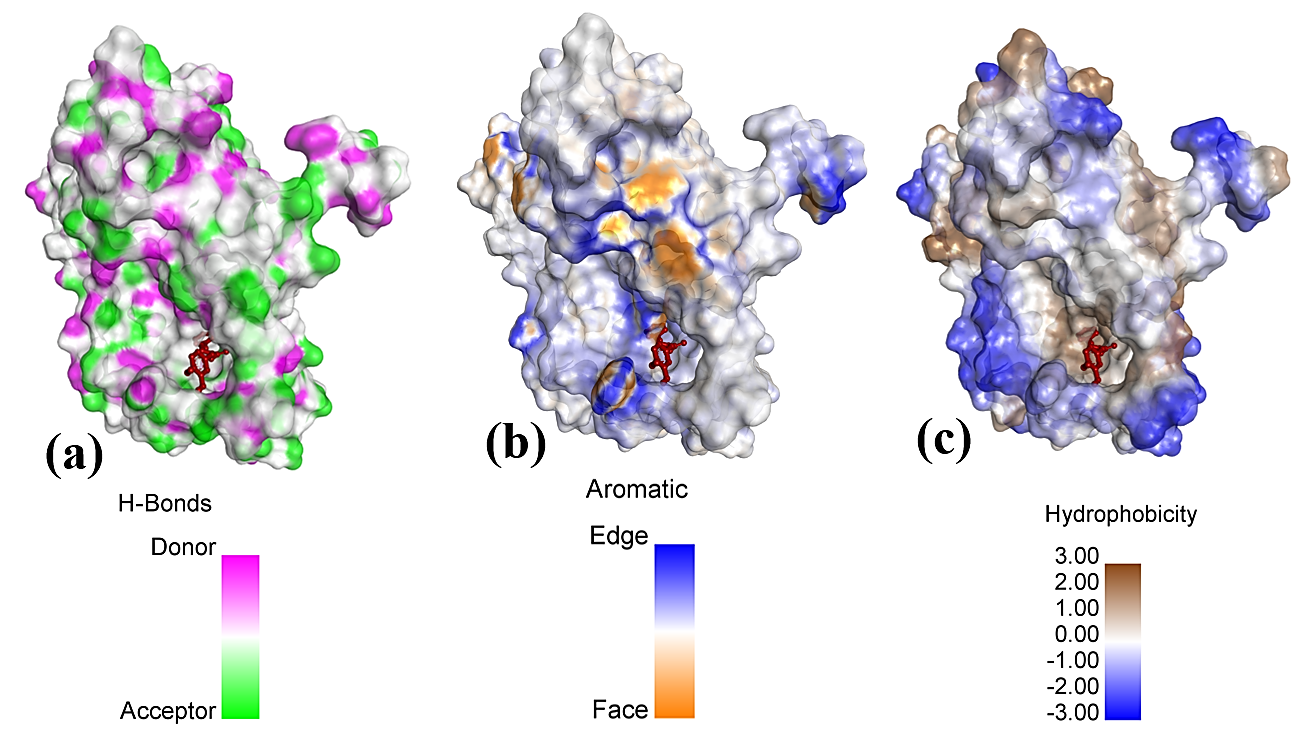

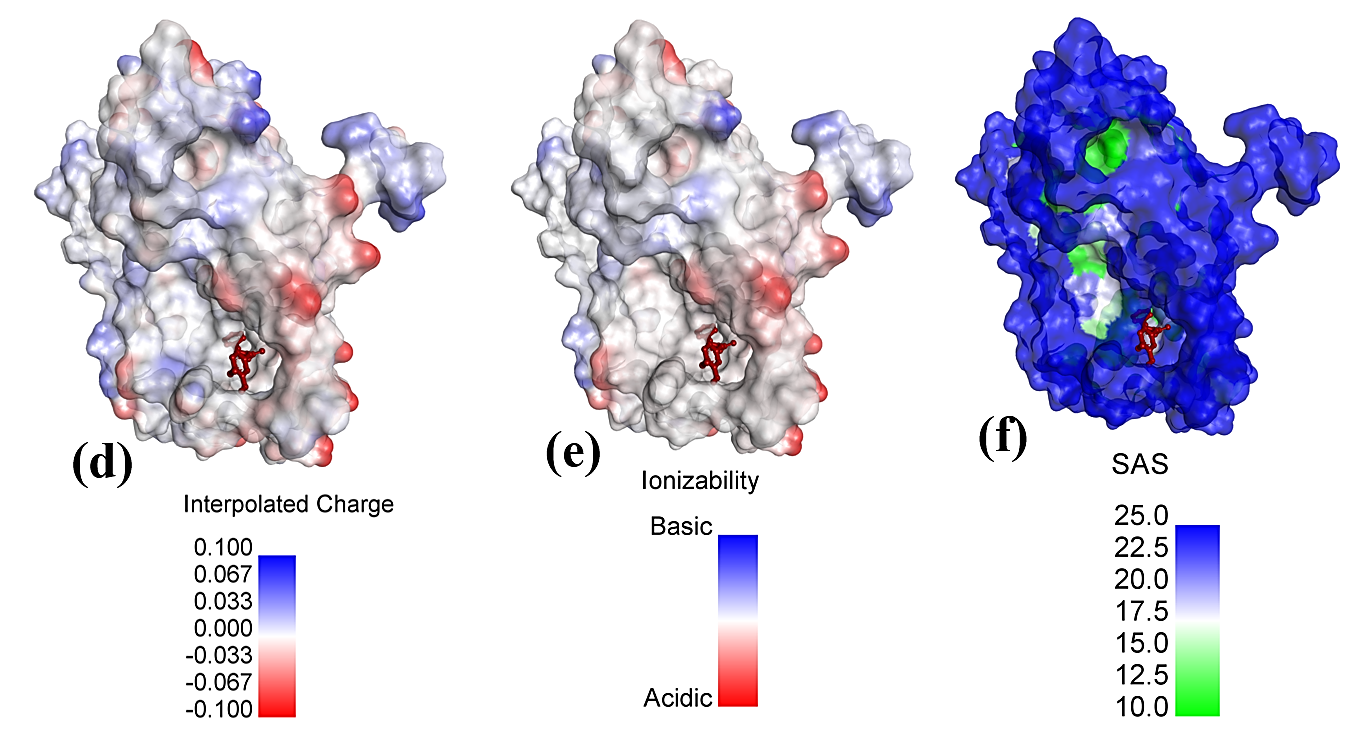


**Fig. S11.** Total density surface of docked ligand L3 with cavity of ERα of breast cancer. Hydrogen bond donor and acceptor mesh represented by pink and green colors **(a).** Surface representation of Aromatic and hydrophobic, pockets represented with blue and brown color **(c, d).** Interpolated charges and ionizability pockets as shown in blue and red color **(d, e).** SAS (Total solvent accessible) express in blue and green color **(f).**


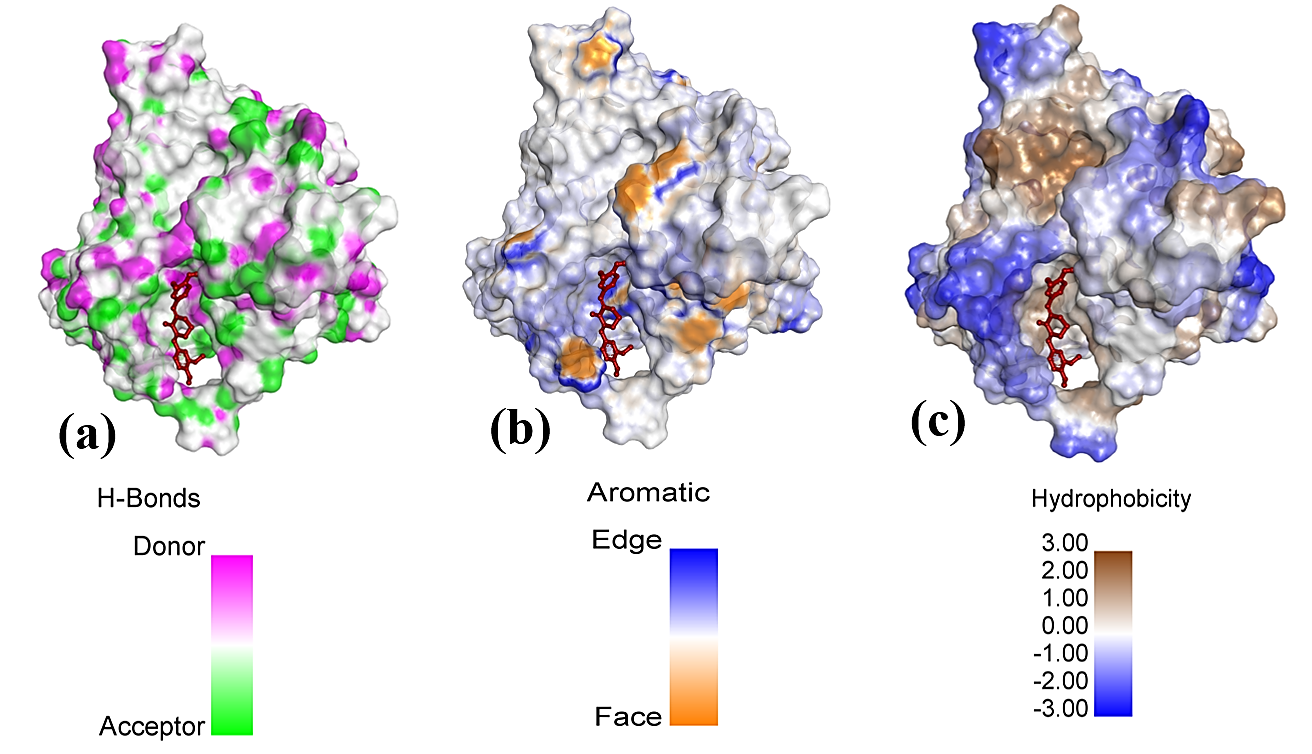

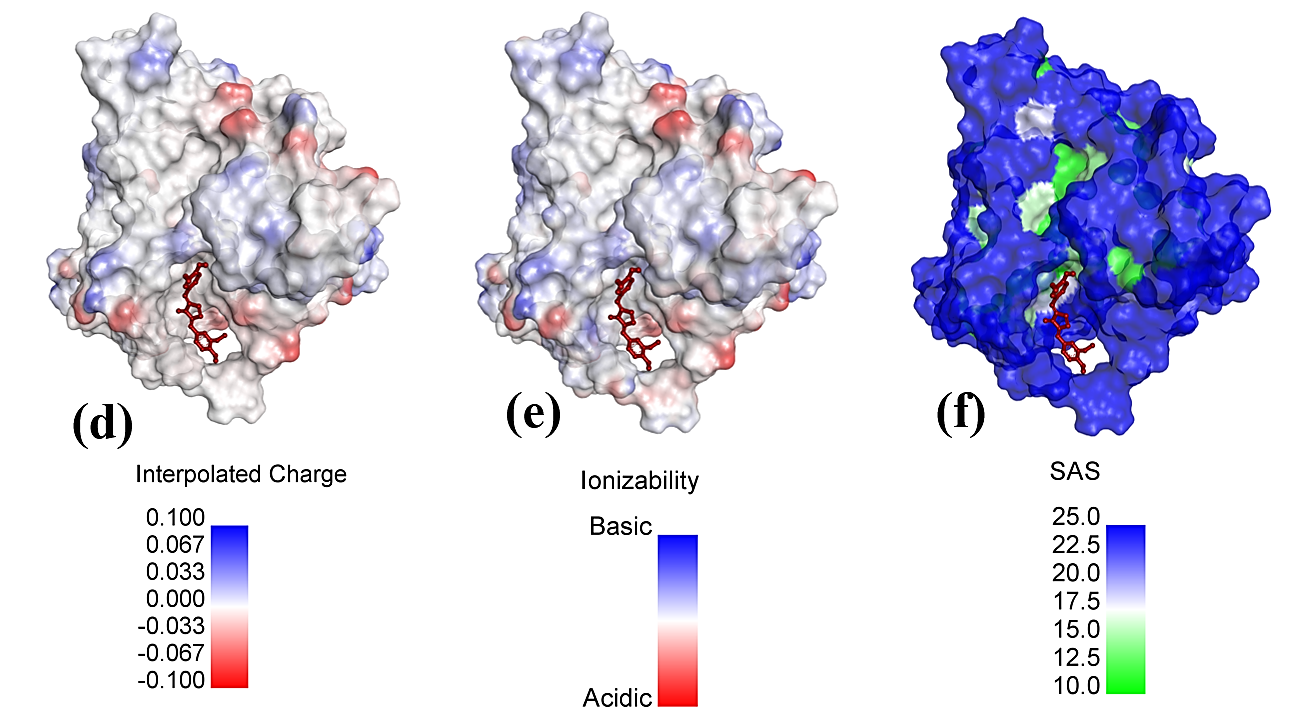


**Fig. S12.** Total density surface of docked ligand L4 with cavity of ERα of breast cancer. Hydrogen bond donor and acceptor mesh represented by pink and green colors **(a).** Surface representation of Aromatic and hydrophobic, pockets represented with blue and brown color **(c, d).** Interpolated charges and ionizability pockets as shown in blue and red color **(d, e).** SAS (Total solvent accessible) express in blue and green color **(f).**


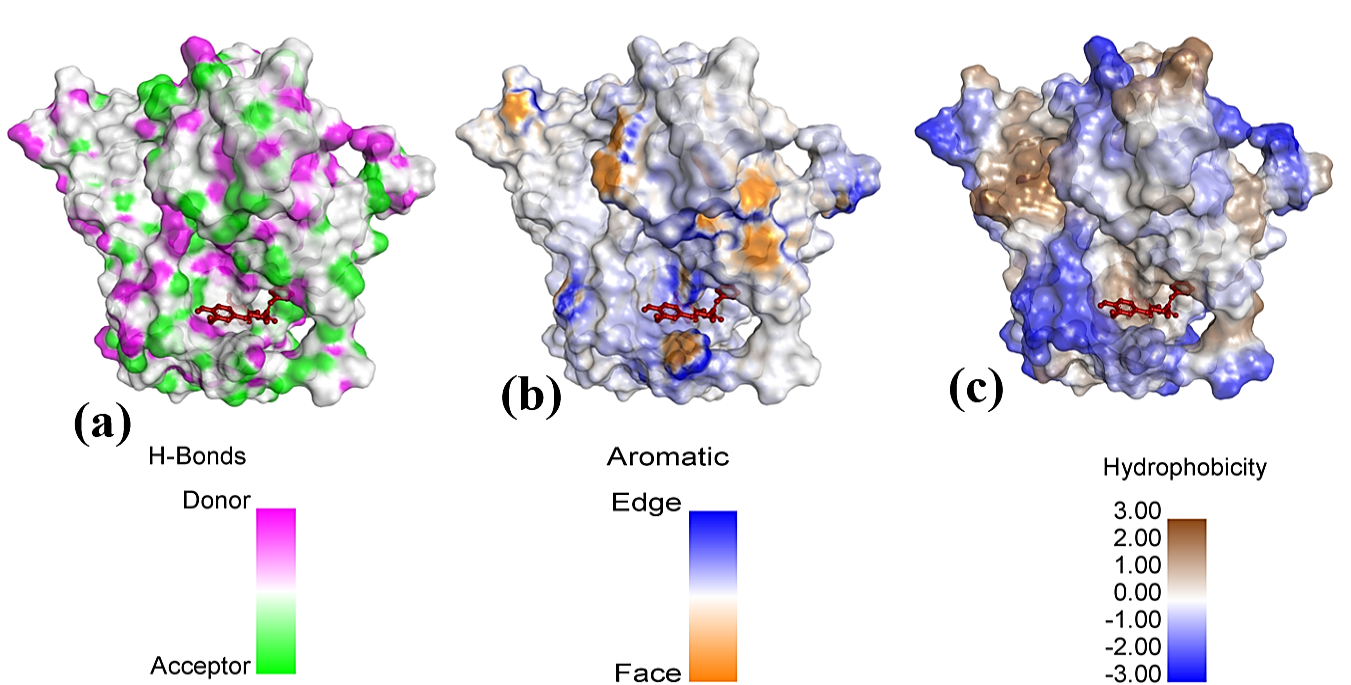

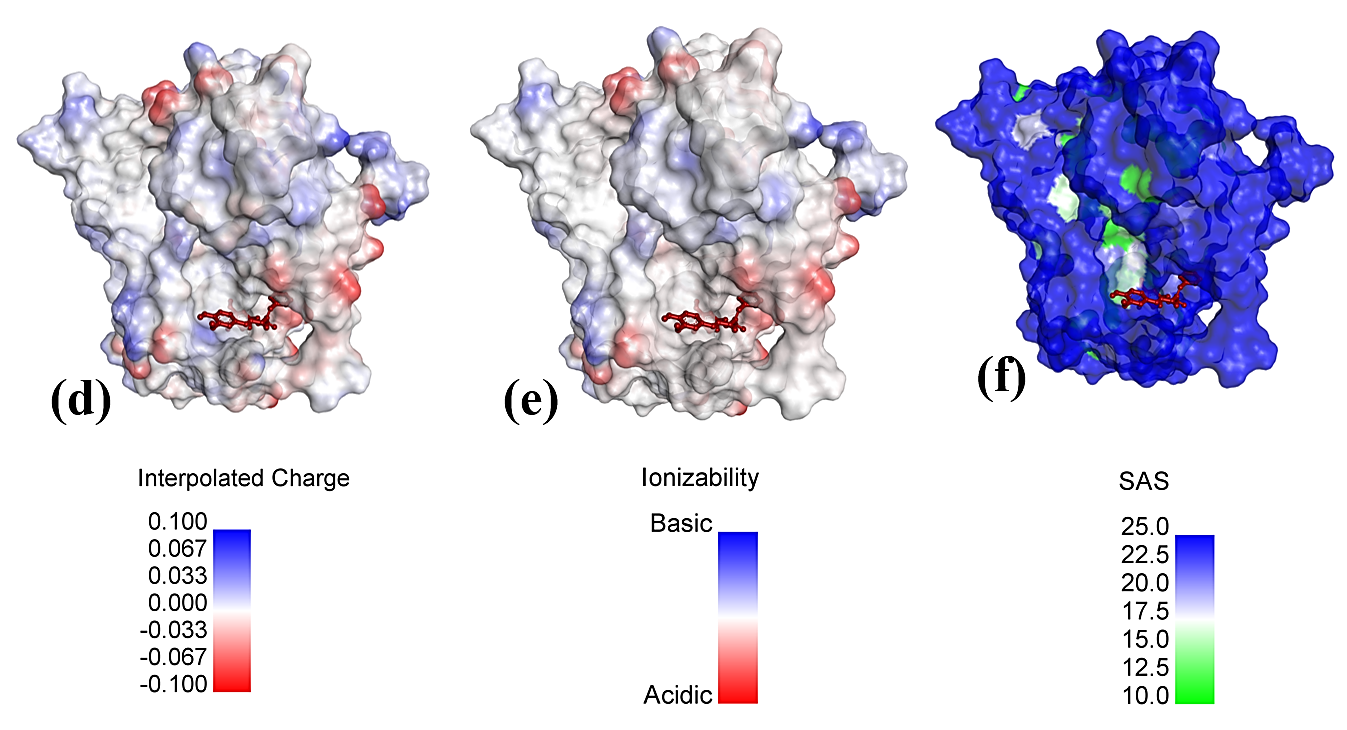


**Fig. S13.** Total density surface of docked ligand L5 with cavity of ERα of breast cancer. Hydrogen bond donor and acceptor mesh represented by pink and green colors **(a).** Surface representation of Aromatic and hydrophobic, pockets represented with blue and brown color **(c, d).** Interpolated charges and ionizability pockets as shown in blue and red color **(d, e).** SAS (Total solvent accessible) express in blue and green color **(f).**


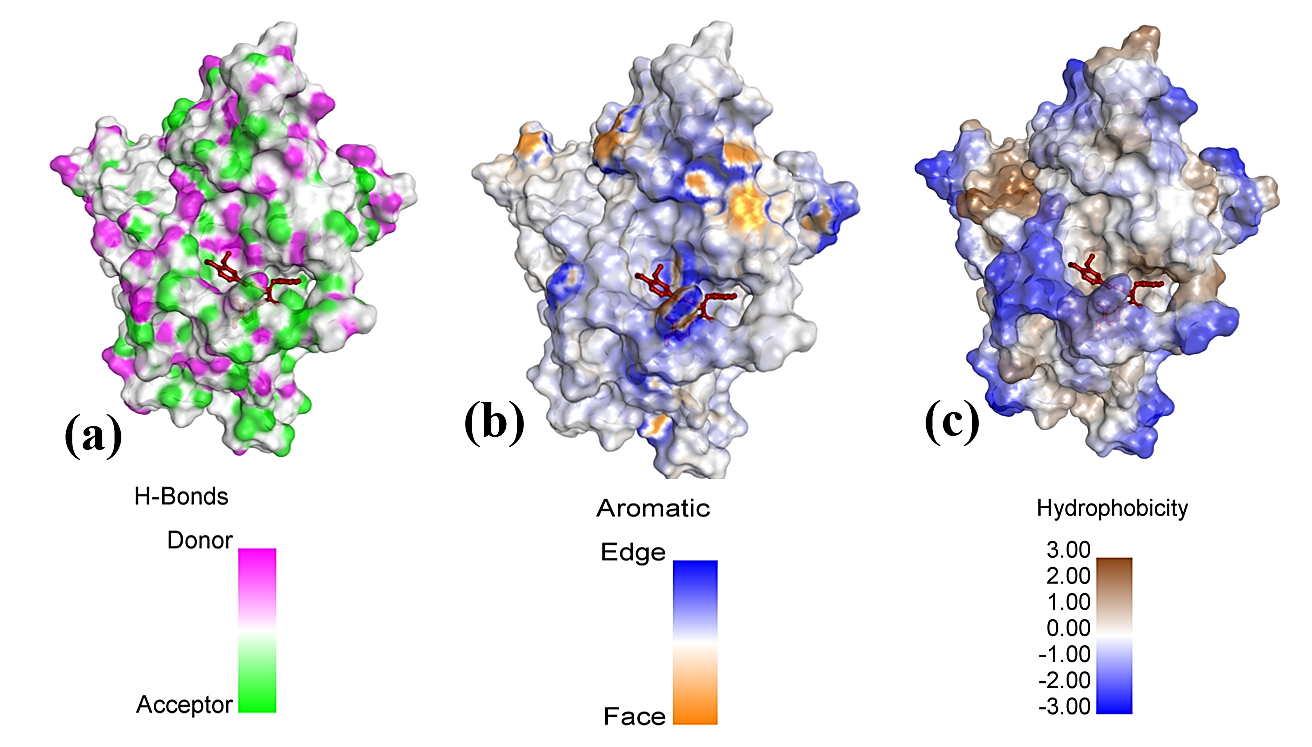

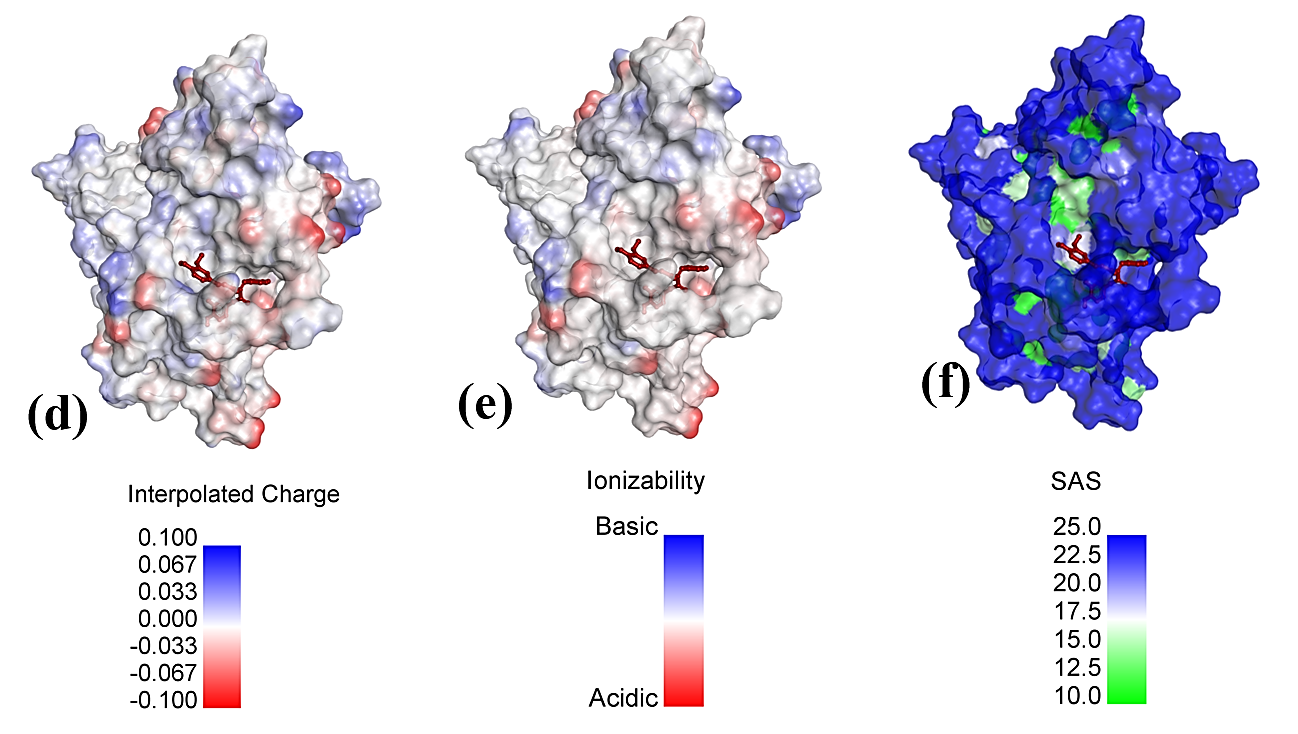


**Fig. S14.** Total density surface of docked ligand L6 with cavity of ERα of breast cancer. Hydrogen bond donor and acceptor mesh represented by pink and green colors **(a).** Surface representation of Aromatic and hydrophobic, pockets represented with blue and brown color **(c, d).** Interpolated charges and ionizability pockets as shown in blue and red color **(d, e).** SAS (Total solvent accessible) express in blue and green color **(f).**


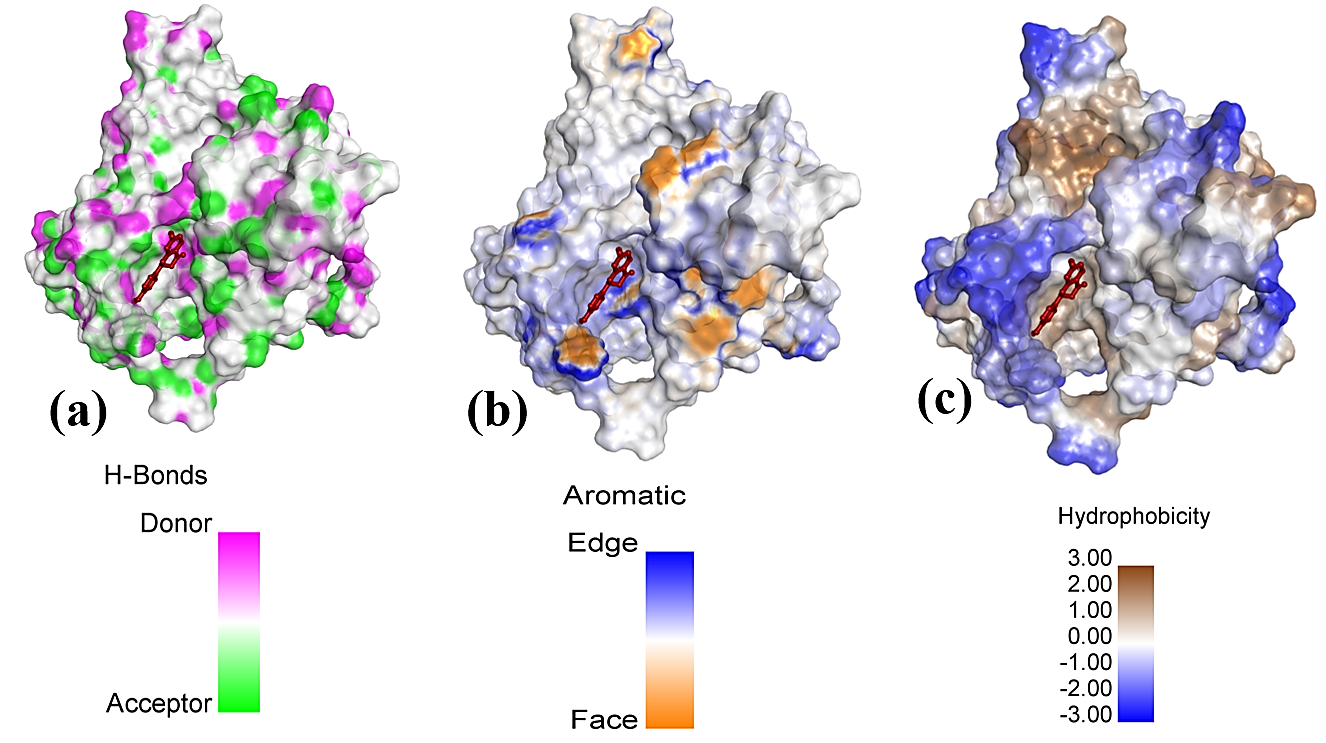

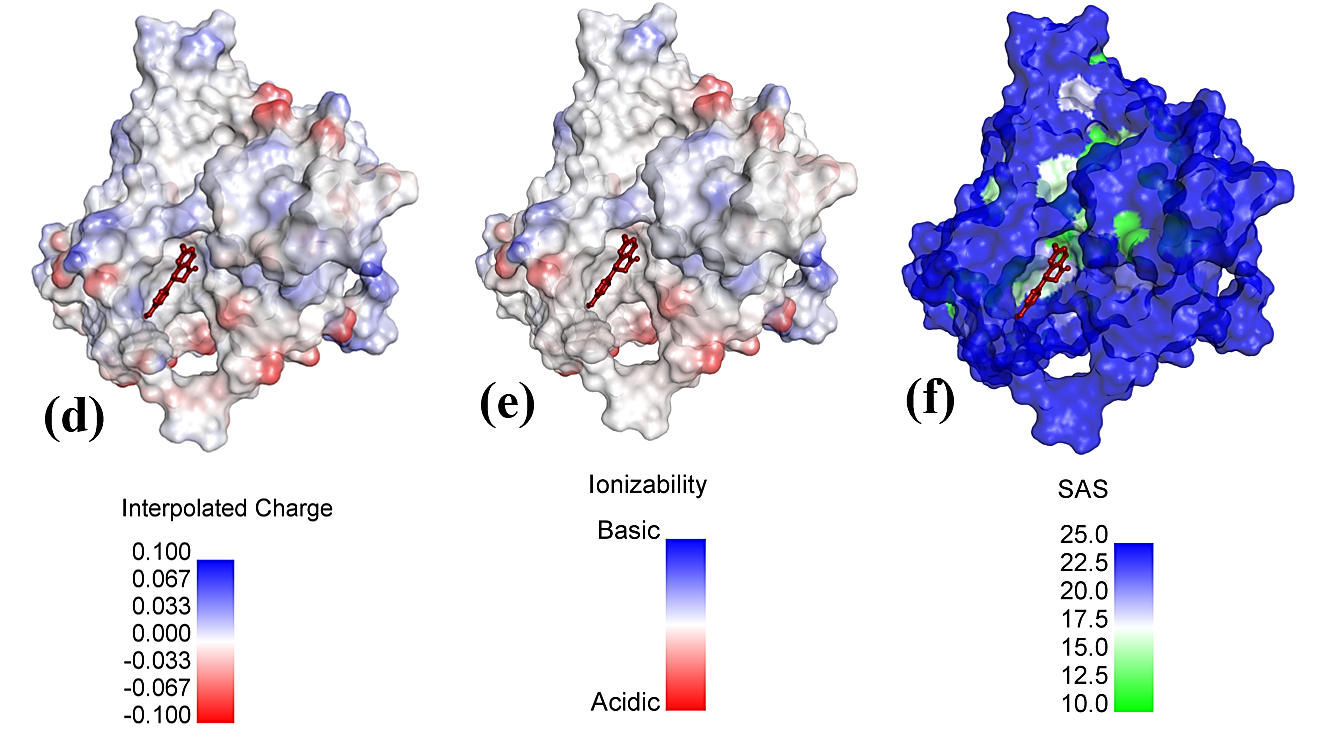


**Fig. S15.** Total density surface of docked ligand L7 with cavity of ERα of breast cancer. Hydrogen bond donor and acceptor mesh represented by pink and green colors **(a).** Surface representation of Aromatic and hydrophobic, pockets represented with blue and brown color **(c, d).** Interpolated charges and ionizability pockets as shown in blue and red color **(d, e).** SAS (Total solvent accessible) express in blue and green color **(f).**

**Fig.S16.** Total density surface of docked ligand L8 with cavity of ERα of breast cancer. Hydrogen bond donor and acceptor mesh represented by pink and green colors **(a).** Surface representation of Aromatic and hydrophobic, pockets represented with blue and brown color **(c, d).** Interpolated charges and ionizability pockets as shown in blue and red color **(d, e).** SAS (Total solvent accessible) express in blue and green color **(f).**


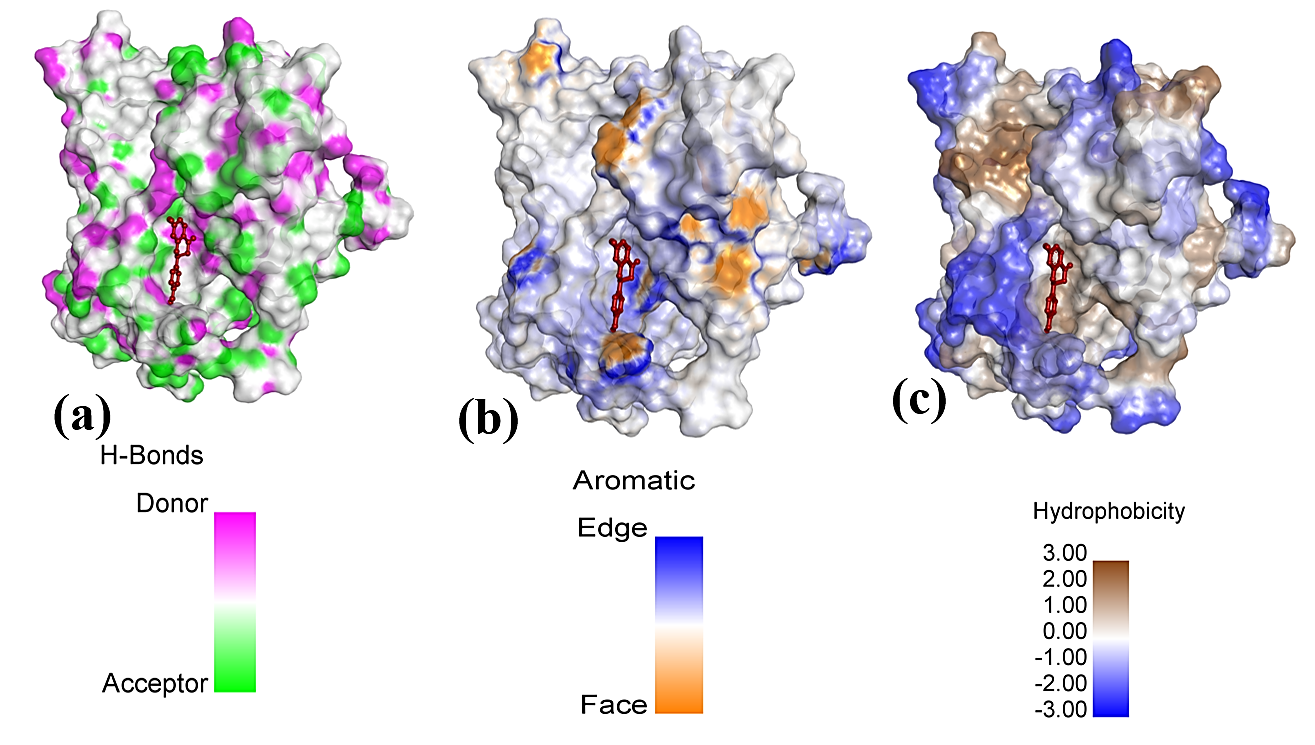

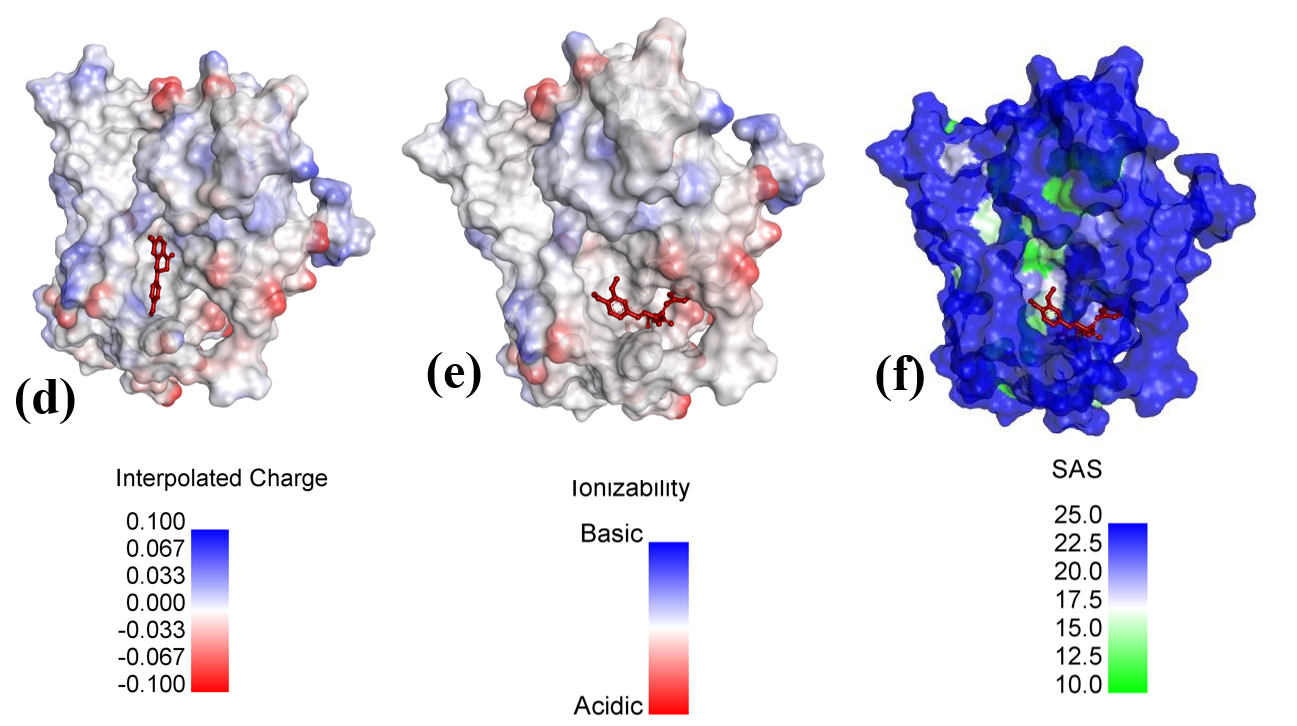

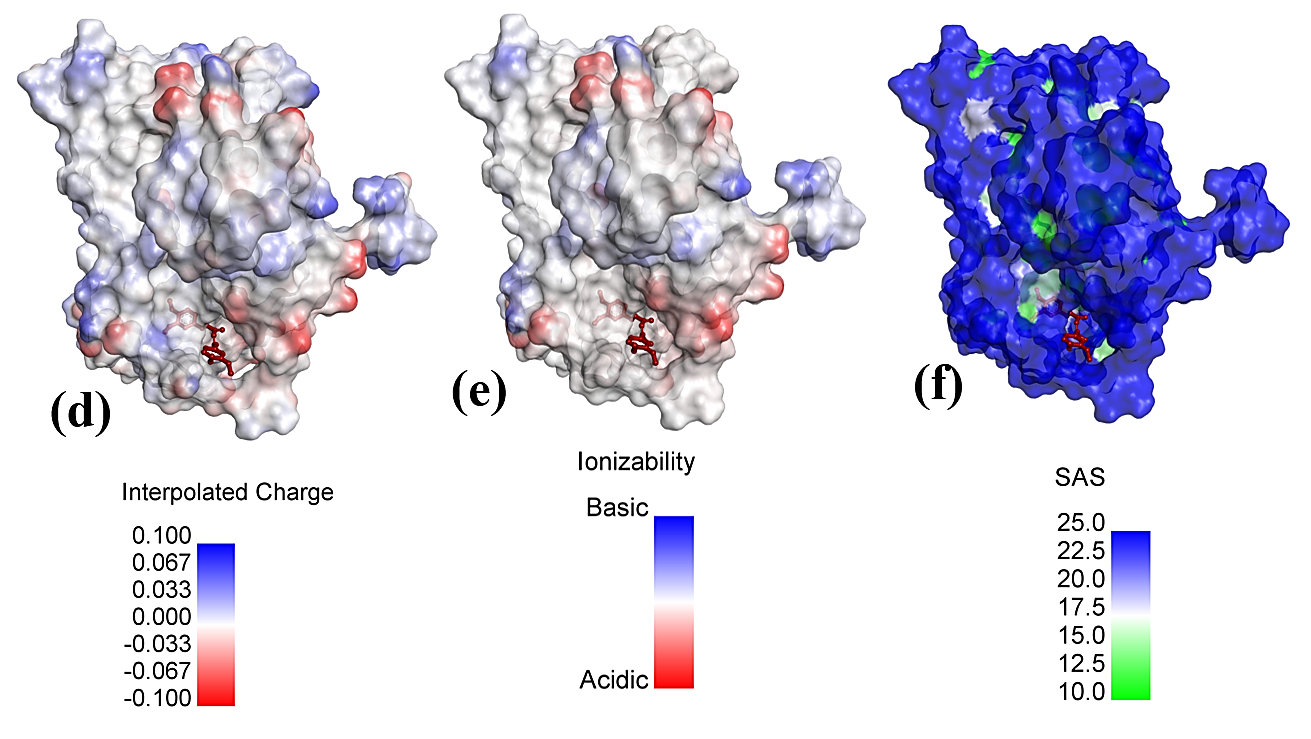

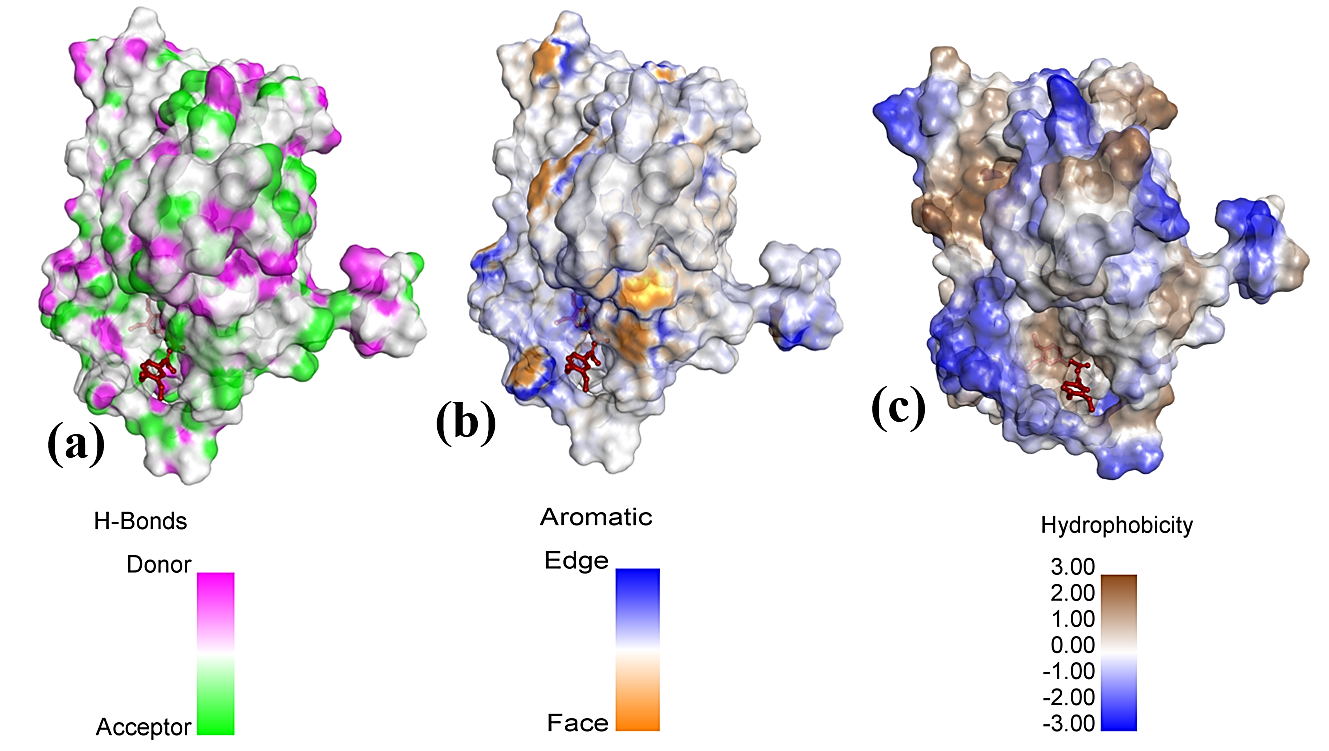


**Fig. S17.** Total density surface of docked ligand L9 with cavity of ERα of breast cancer. Hydrogen bond donor and acceptor mesh represented by pink and green colors **(a).** Surface representation of Aromatic and hydrophobic, pockets represented with blue and brown color **(c, d).** Interpolated charges and ionizability pockets as shown in blue and red color **(d, e).** SAS (Total solvent accessible) express in blue and green color **(f).**


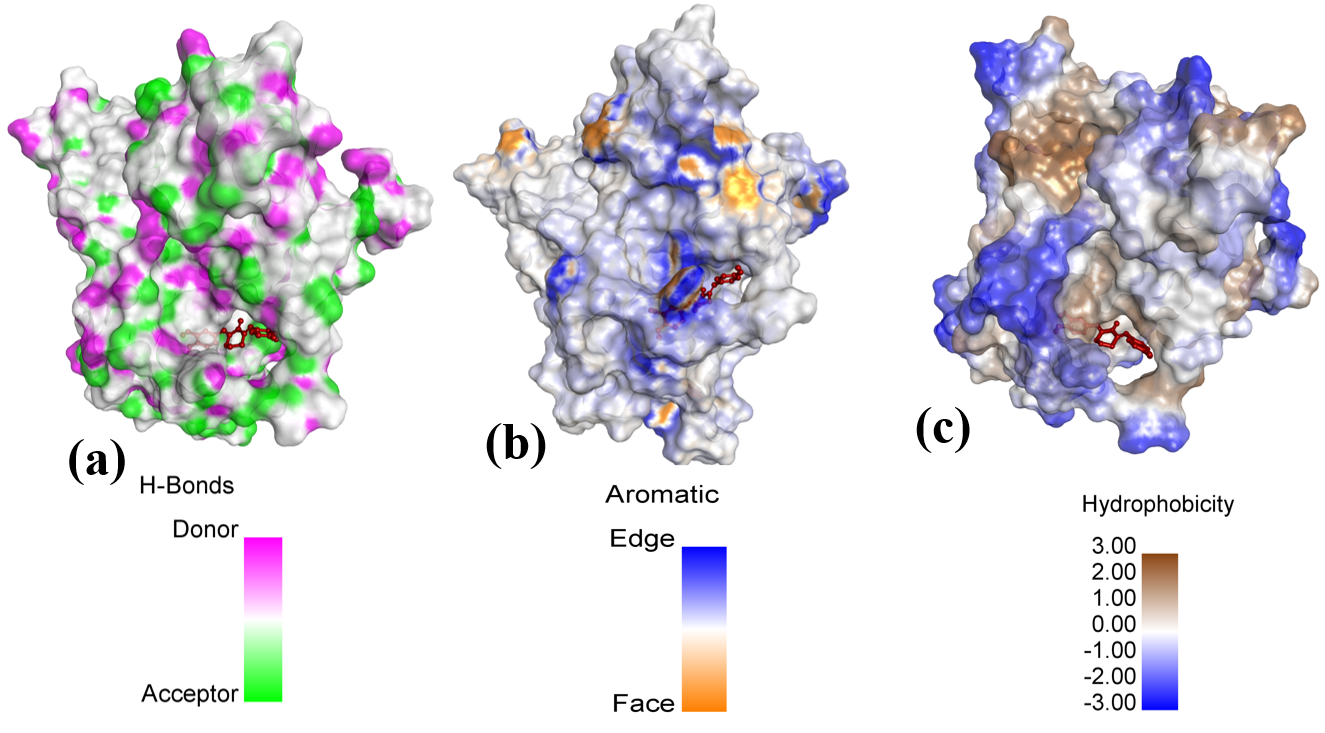

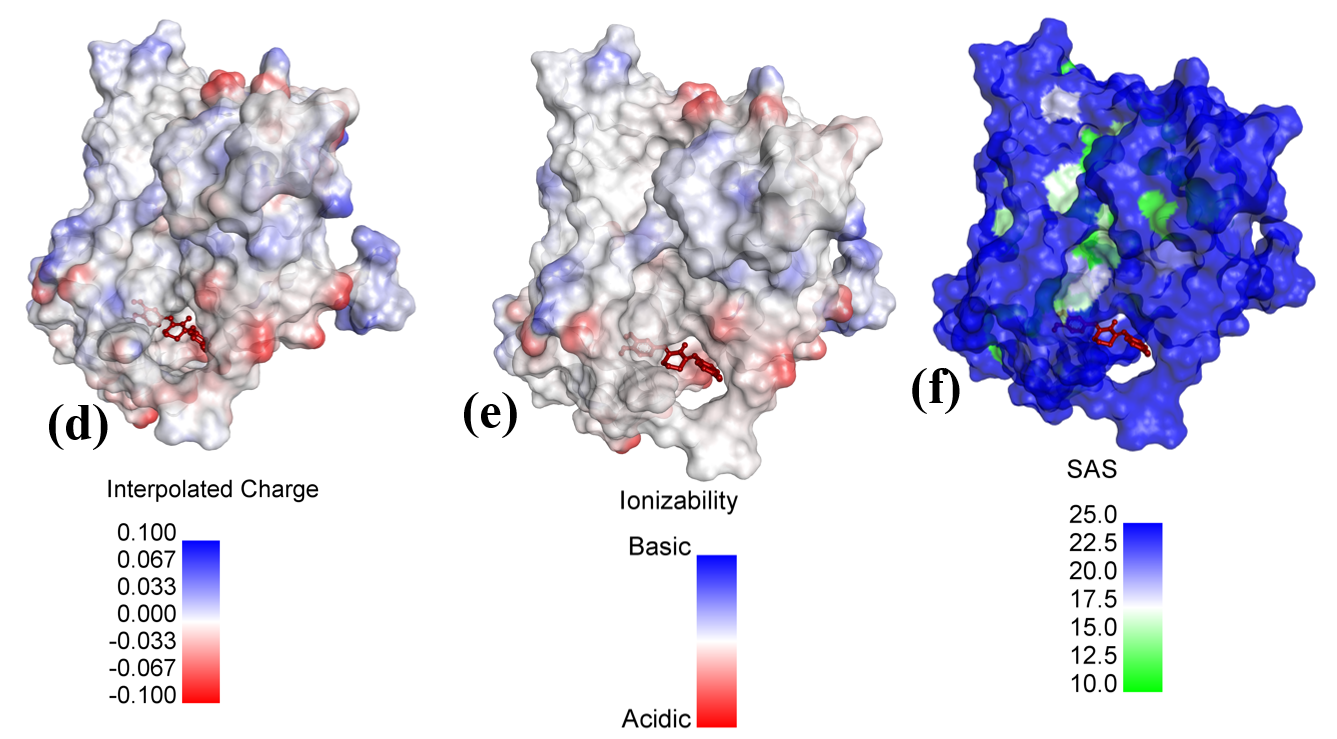


**Fig. S18.** Total density surface of docked ligand L10 with cavity of ERα of breast cancer. Hydrogen bond donor and acceptor mesh represented by pink and green colors **(a).** Surface representation of Aromatic and hydrophobic, pockets represented with blue and brown color **(c, d).** Interpolated charges and ionizability pockets as shown in blue and red color **(d, e).** SAS (Total solvent accessible) express in blue and green color **(f).**


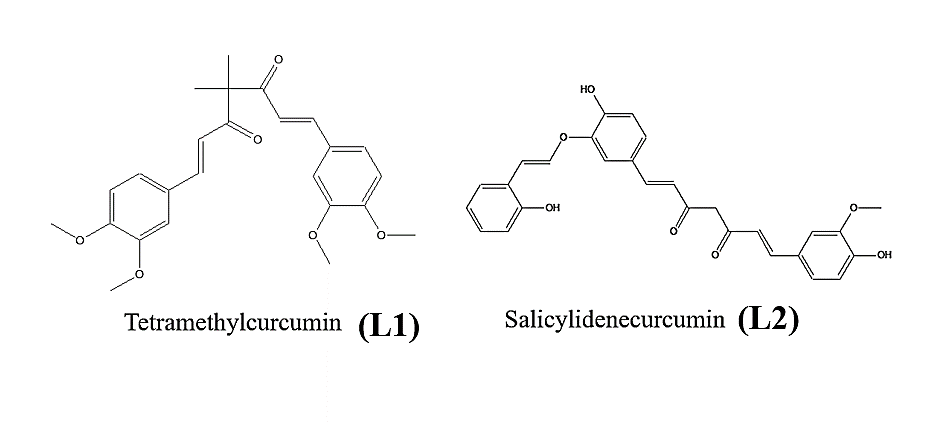

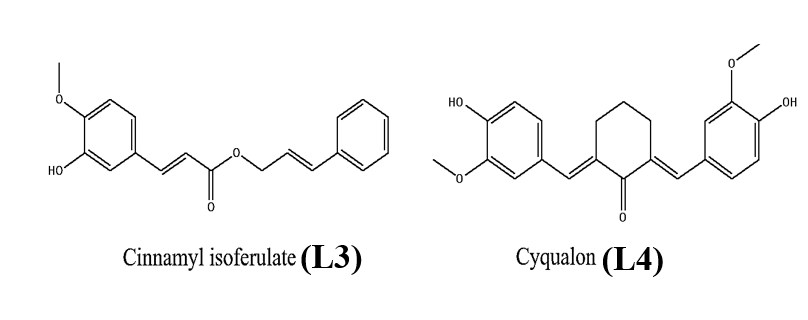

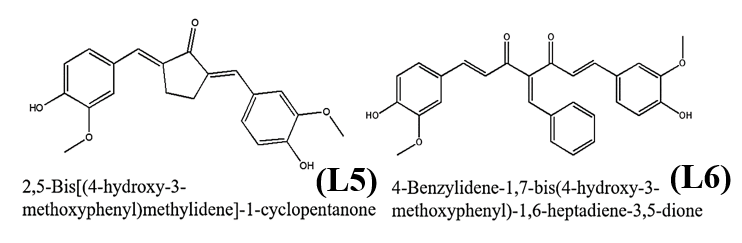

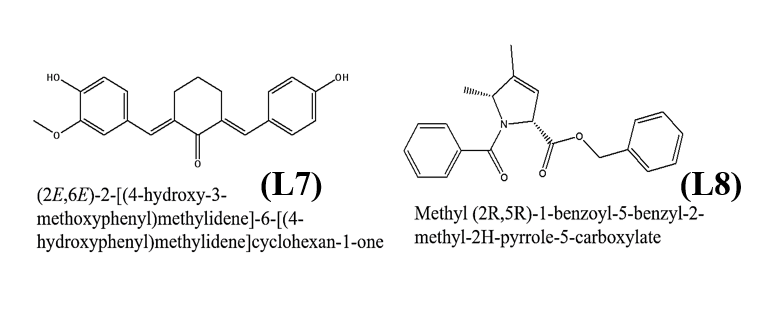

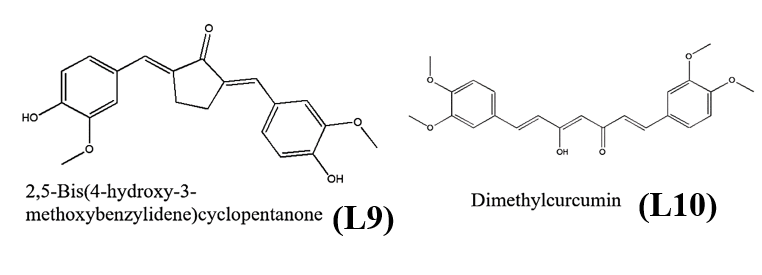


**Fig. S19**. Structures of selected curcumin natural derivatives used in the current molecular docking study.

**Table S2.** The information about(50) docked ligand with their name, PubChem ID, SMILIES and molecular weight (g/mol).

| **Ligands** | **PubChem ID** | **MW (g/mol)** | **SMILES** |
| --- | --- | --- | --- |
| **L1** | 11487078 | 424 | CC(C(=O)C=CC1=CC(=C(C=C1)OC)OC)C  (=O)C=CC2=CC(=C(C=C2)OC)OC |
| **L2** | 129731543 | 472 | COC1=C(C=CC(=C1)C=CC(=O)CC(=O)C  =CC2=CC(=C(C=C2)O)OC=CC3=CC=CC=C3O)O |
| **L3** | 14151012 | 310 | COC1=C(C=C(C=C1)C=CC(=O)OCC=  CC2=CC=CC=C2)O |
| **L4** | 1550234 | 366 | COC1=C(C=CC(=C1)C=C2CCCC(=CC3=  CC(=C(C=C3)O)OC)C2=O)O |
| **L5** | 238783 | 352 | COC1=C(C=CC(=C1)C=C2CCC(=CC3=  CC(=C(C=C3)O)OC)C2=O)O |
| **L6** | 44451939 | 456 | COC1=C(C=CC(=C1)/C=C/C(=O)C(=  CC2=CC=CC=C2)C(=O)  /C=C/C3=CC(=C(C=C3)O)OC)O |
| **L7** | 44562535 | 336 | COC1=C(C=CC(=C1)C=C2CCCC(=CC3=  CC=C(C=C3)O)C2=O)O |
| **L8** | 54597187 | 335 | CC1C=CC(N1C(=O)C2=CC=CC=C2)(CC3=  CC=CC=C3)C(=O)OC |
| **L9** | 5470829 | 352 | COC1=C(C=CC(=C1)C=C2CCC(=CC3=  CC(=C(C=C3)O)OC)C2=O)O |
| **L10** | 6477182 | 396 | COC1=C(C=C(C=C1)C=CC(=CC(=O)C=CC2  =CC(=C(C=C2)OC)OC)O)OC |
| **L11** | 11617052 | 340 | COC1=C(C=C(C=C1)C=CC(=O)C=CC2=CC  (=C(C=C2)O)OC)OC |
| **L12** | 16727530 | 448 | COC1=C(C=CC(=C1)C=CC(=O)CC(=O)C=CC2=  CC(=C(C=C2)OCC=C)OC)OCC=C |
| **L13** | 14440537 | 454 | CC©©N1C(=NN=N1)C(C2=C(C=C  (C=C2)OC)OC)N3CCN(CC3)C4=CC=C(C=C4)F |
| **L14** | 6438480 | 276 | CCCCCCCC(=O)C=CC1=CC(=C(C=C1)O)OC |
| **L15** | 851406 | 260 | CC1=C2C(=CC3=C1OC(CC3)©C)CCC(O2)©C |
| **L16** | 9794897 | 274 | CC1=NC2=CC(=C(C=C2N=C1Cl)Cl)Cl |
| **L17** | 750873 | 342 | COC1=CC(=C(C=C1)C2=CC(=CC3=  CC=C(C=C3)Cl)C(=O)O2)OC |
| **L18** | 88539422 | 406 | COC1=C(C=CC(=C1)C=CC(=O)C(CC#C C(=O)C=CC2=CC(=C(C=C2)O)OC)O |
| **L19** | 162952 | 292 | CCCCCC(=O)CC(=O)CCC1=CC(=C(C=C1)O)OC |
| **L20** | 131752598 | 318 | CCCCCCCC(=O)CC(=O)C=CC1=CC(=C(C=C1)O)OC |
| **L21** | 442793 | 294 | CCCCCC(CC(=O)CCC1=CC(=C(C=C1)O)OC)O |
| **L22** | 11959088 | 262 | CCCCC=CC(=O)CCC1=CC(=C(C=C1)O)OC |
| **L23** | 131752987 | 296 | COC1=C(C=CC(=C1)C=CC(=O)C=CC2=CC=C(C=C2)O)O |
| **L24** | 5317593 | 326 | COC1=C(C=CC(=C1)CCC(=O)C=CCCC2=CC=C(C=C2)O)O |
| **L25** | 44610342 | 318 | CCCCCCCC(=O)CC(=O)C=CC1=CC(=C(C=C1)O)OC |
| **L26** | 129887671 | 278 | COC1=C(C=CC(=C1)C=CC(=O)CCCCCCO)O |
| **L27** | 5280698 | 272 | COC1=C(C=CC(=C1)C=CC2=CC(=C(C=C2)O)OC)O |
| **L28** | 9548762 | 272 | COC1=C(C=CC(=C1)C=CC2=CC(=C(C=C2)O)OC)O |
| **L29** | 132993165 | 492 | COC1=C(C=CC(=C1)C=CC(=O)CC(=O)C=CC2=CC(=C(C=C2)O)  OC=CC3=CC(=C(C=C3)F)F)O |
| **L30** | 5469424 | 338 | COC1=C(C=CC(=C1)C=CC(=O)CC(=O)C=CC2=CC=C(C=C2)O)O |
| **L31** | 10429233 | 370 | COC1=C(C=CC(=C1)CCC(=O)CC(=O)C=CC2=CC(=C(C=C2)O)OC)O |
| **L32** | 127048275 | 370 | COC1=C(C=CC(=C1)C=CC(=O)OC(=O)  C=CC2=CC(=C(C=C2)O)OC)O |
| **L33** | 70680293 | 235 | COC1=C(C=CC(=C1)C=CC(=O)CC(=O)[O-])O |
| **L34** | 129847744 | 386 | COC1=C(C=CC(=C1)C=CC(=O)CC(=O)C=  CC2=CC(=C(C=C2)O)OCF)O |
| **L35** | 76333842 | 356 | CC(=C©C(=O)C1=CC(=C(C=C1)O)OC)  C(=O)C2=CC(=C(C=C2)O)OC |
| **L36** | 5354238 | 192 | CC(=O)C=CC1=CC(=C(C=C1)O)OC |
| **L37** | 131750840 | 386 | COC1=C(C=CC(=C1)C=C(C(=CC2=CC(=  C(C=C2)O)OC)C(=O)O)C(=O)O)O |
| **L38** | 129888548 | 254 | CC(=O)C(=CC1=CC(=C(C=C1)O)OC)C(=O)Cl |
| **L39** | 866407 | 287 | CC©NC1=C2C=NN(C2=NC=N1)C3=CC=C(C=C3)Cl |
| **L40** | 6441913 | 356 | COC1=C(C=CC(=C1)C=CCOC(=O)  C=CC2=CC(=C(C=C2)O)OC)O |
| **L41** | 969516 | 368 | COC1=C(C=CC(=C1)C=CC(=O)CC(=O)  C=CC2=CC(=C(C=C2)O)OC)O |
| **L42** | 5281775 | 356 | COC1=C(C=CC(=C1)CCC=CC(=O)CCC2=CC(=C(C=C2)O)OC)O |
| **L43** | 56597252 | 446 | CC1=CN2C(=CC(=N2)C3CCCCN3C(=O)C4=  CC=CC5=C4OCC5)N=C1N6CCC(C6)N |
| **L44** | 9963373 | 358 | COC1=C(C=CC(=C1)CCC(=O)CC(=O)  CCC2=CC(=C(C=C2)O)O)O |
| **L45** | 251430 | 380 | COC1=CC(=C(C2=CC(=C(C=C2)O)OC)  C3=CC(=C(C=C3)O)OC)C=CC1=O |
| **L46** | 5281794 | 276 | CCCCCC=CC(=O)CCC1=CC(=C(C=C1)O)OC |
| **L47** | 124072 | 372 | COC1=C(C=CC(=C1)CCC(=O)CC  (=O)CCC2=CC(=C(C=C2)O)OC)O |
| **L48** | 133145 | 312 | COC1=C(C=CC(=C1)CCC(=O)CCCCC2=CC=CC=C2)O |
| **L49** | 56597215 | 302 | COC1=CC(=O)C(=CC1=O)CCCC2=CC(=C(C=C2)O)OC |
| **L50** | 131750809 | 460 | COC1=C(C=C(C=C1)C2COC3=C(C=C(C=C3O2)  OC4C(C(C(C(O4)C(=O)O)O)O)O)O)O |

**Table S3.** Binding energy, drug likeness and pharmacokinetic properties of studied ligands under Lipinski’s Rule of five(RO5).

| **Ligands** | **Binding Energy**  **(Kcal/mol)** | **ADME Properties ( Lipinski’s Rule of five )** | |
| --- | --- | --- | --- |
| **Properties** | **value** |
| **L1** | -7.4 | Molecular weight ( **<** 500Da) | 424 |
| Log P ( < 5) | 4.61 |
| H- bond donor ( 5) | 0 |
| H – bond acceptor (<10) | 6 |
| Violation | 0 |
| **L2** | -8.6 | Molecular weight ( **<** 500Da) | 472 |
| Log P ( < 5) | 5.11 |
| H- bond donor ( 5) | 3 |
| H – bond acceptor (<10) | 7 |
| Violation | 0 |
| **L3** | -7.5 | Molecular weight ( **<** 500Da) | 310 |
| Log P ( < 5) | 5.68 |
| H- bond donor ( 5) | 1 |
| H – bond acceptor (<10) | 4 |
| Violation | 0 |
| **L4** | -7.5 | Molecular weight ( **<** 500Da) | 366 |
| Log P ( < 5) | 4.33 |
| H- bond donor ( 5) | 3 |
| H – bond acceptor (<10) | 5 |
| Violation | 0 |
| **L5** | -7.4 | Molecular weight ( **<** 500Da) | 352 |
| Log P ( < 5) | 3.94 |
| H- bond donor ( 5) | 4 |
| H – bond acceptor (<10) | 5 |
| Violation | 0 |
| **L6** | -8.8 | Molecular weight ( **<** 500Da) | 456 |
| Log P ( < 5) | 5.06 |
| H- bond donor ( 5) | 2 |
| H – bond acceptor (<10) | 6 |
| Violation | 0 |
| **L7** | -8.2 | Molecular weight ( **<** 500Da) | 336 |
| Log P ( < 5) | 4.32 |
| H- bond donor ( 5) | 2 |
| H – bond acceptor (<10) | 4 |
| Violation | 0 |
| **L8** | -9 | Molecular weight ( **<** 500Da) | 335 |
| Log P ( < 5) | 3.24 |
| H- bond donor ( 5) | 3 |
| H – bond acceptor (<10) | 0 |
| Violation | 0 |
| **L9** | -7.4 | Molecular weight ( **<** 500Da) | 352 |
| Log P ( < 5) | 3.94 |
| H- bond donor ( 5) | 2 |
| H – bond acceptor (<10) | 5 |
| Violation | 0 |
| **L10** | -7.4 | Molecular weight ( **<** 500Da) | 396 |
| Log P ( < 5) | 1 |
| H- bond donor ( 5) | 6 |
| H – bond acceptor (<10) | 4.45 |
| Violation | 0 |
| **L11** | -6.9 | Molecular weight ( **<** 500Da) | 340 |
| Log P ( < 5) | 3.71 |
| H- bond donor ( 5) | 1 |
| H – bond acceptor (<10) | 5 |
| Violation | 0 |
| **L12** | -7.2 | Molecular weight ( **<** 500Da) | 448 |
| Log P ( < 5) | 5 |
| H- bond donor ( 5) | 0 |
| H – bond acceptor (<10) | 6 |
| Violation | 1 |
| **L13** | -5.1 | Molecular weight ( **<** 500Da) | 454 |
| Log P ( < 5) | 4.49 |
| H- bond donor ( 5) | 0 |
| H – bond acceptor (<10) | 8 |
| Violation | 0 |
| **L14** | -6.3 | Molecular weight ( **<** 500Da) | 276 |
| Log P ( < 5) | 4.39 |
| H- bond donor ( 5) | 1 |
| H – bond acceptor (<10) | 3 |
| Violation | 0 |
| **L15** | -6 | Molecular weight ( **<** 500Da) | 260 |
| Log P ( < 5) | 4.20 |
| H- bond donor ( 5) | 0 |
| H – bond acceptor (<10) | 2 |
| Violation | 0 |
| **L16** | -6 | Molecular weight ( **<** 500Da) | 247 |
| Log P ( < 5) | 3.89 |
| H- bond donor ( 5) | 0 |
| H – bond acceptor (<10) | 2 |
| Violation | 0 |
| **L17** | -6.8 | Molecular weight ( **<** 500Da) | 342 |
| Log P ( < 5) | 4.3 |
| H- bond donor ( 5) | 0 |
| H – bond acceptor (<10) | 4 |
| Violation | 0 |
| **L18** | -6 | Molecular weight ( **<** 500Da) | 406 |
| Log P ( < 5) | 3.61 |
| H- bond donor ( 5) | 2 |
| H – bond acceptor (<10) | 6 |
| Violation | 0 |
| **L19** | -6.1 | Molecular weight ( **<** 500Da) | 292 |
| Log P ( < 5) | 3.4 |
| H- bond donor ( 5) | 1 |
| H – bond acceptor (<10) | 4 |
| Violation | 0 |
| **L20** | -6.8 | Molecular weight ( **<** 500Da) | 318 |
| Log P ( < 5) | 4.30 |
| H- bond donor ( 5) | 1 |
| H – bond acceptor (<10) | 4 |
| Violation | 1 |
| **L21** | -7.1 | Molecular weight ( **<** 500Da) | 294 |
| Log P ( < 5) | 3.23 |
| H- bond donor ( 5) | 2 |
| H – bond acceptor (<10) | 4 |
| Violation | 0 |
| **L22** | -7.6 | Molecular weight ( **<** 500Da) | 262 |
| Log P ( < 5) | 3.64 |
| H- bond donor ( 5) | 1 |
| H – bond acceptor (<10) | 3 |
| Violation | 0 |
| **L23** | -7.6 | Molecular weight ( **<** 500Da) | 296 |
| Log P ( < 5) | 3.40 |
| H- bond donor ( 5) | 2 |
| H – bond acceptor (<10) | 4 |
| Violation | 0 |
| **L24** | -7.1 | Molecular weight ( **<** 500Da) | 318 |
| Log P ( < 5) | 4.30 |
| H- bond donor ( 5) | 1 |
| H – bond acceptor (<10) | 4 |
| Violation | 1 |
| **L25** | -6.5 | Molecular weight ( **<** 500Da) | 278 |
| Log P ( < 5) | 2.92 |
| H- bond donor ( 5) | 2 |
| H – bond acceptor (<10) | 4 |
| Rotatable bond | 9 |
| Violation | 0 |
| **L26** | -6.3 | Molecular weight ( **<** 500Da) | 278 |
| Log P ( < 5) | 2.92 |
| H- bond donor ( 5) | 2 |
| H – bond acceptor (<10) | 4 |
| Violation | 0 |
| **L27** | -6.6 | Molecular weight ( **<** 500Da) | 272 |
| Log P ( < 5) | 3.28 |
| H- bond donor ( 5) | 2 |
| H – bond acceptor (<10) | 4 |
| Violation | 0 |
| **L28** | -5.9 | Molecular weight ( **<** 500Da) | 272 |
| Log P ( < 5) | 3.28 |
| H- bond donor ( 5) | 2 |
| H – bond acceptor (<10) | 4 |
| Violation | 0 |
| **L29** | -8.7 | Molecular weight ( **<** 500Da) | 492 |
| Log P ( < 5) | 5.68 |
| H- bond donor ( 5) | 2 |
| H – bond acceptor (<10) | 6 |
| Violation | 0 |
| **L30** | -7.2 | Molecular weight ( **<** 500Da) | 338 |
| Log P ( < 5) | 3.36 |
| H- bond donor ( 5) | 2 |
| H – bond acceptor (<10) | 5 |
| Violation | 0 |
| **L31** | -6.3 | Molecular weight ( **<** 500Da) | 370 |
| Log P ( < 5) | 3.28 |
| H- bond donor ( 5) | 2 |
| H – bond acceptor (<10) | 6 |
| Violation | 0 |
| **L32** | -7.3 | Molecular weight ( **<** 500Da) | 370 |
| Log P ( < 5) | 2.91 |
| H- bond donor ( 5) | 2 |
| H – bond acceptor (<10) | 7 |
| Violation | 0 |
| **L33** | -6.2 | Molecular weight ( **<** 500Da) | 235 |
| Log P ( < 5) | 0.12 |
| H- bond donor ( 5) | 1 |
| H – bond acceptor (<10) | 5 |
| Violation | 0 |
| **L34** | -7.2 | Molecular weight ( **<** 500Da) | 386 |
| Log P ( < 5) | 3.66 |
| H- bond donor ( 5) | 2 |
| H – bond acceptor (<10) | 6 |
| Violation | 0 |
| **L35** | -6.9 | Molecular weight ( **<** 500Da) | 356 |
| Log P ( < 5) | 3.51 |
| H- bond donor ( 5) | 2 |
| H – bond acceptor (<10) | 6 |
| Violation | 0 |
| **L36** | -6.2 | Molecular weight ( **<** 500Da) | 192 |
| Log P ( < 5) | 2.0 |
| H- bond donor ( 5) | 1 |
| H – bond acceptor (<10) | 3 |
| Violation | 0 |
| **L37** | -6.8 | Molecular weight ( **<** 500Da) | 386 |
| Log P ( < 5) | 2.75 |
| H- bond donor ( 5) | 4 |
| H – bond acceptor (<10) | 6 |
| Violation | 0 |
| **L38** | -6.4 | Molecular weight ( **<** 500Da) | 254 |
| Log P ( < 5) | 2.13 |
| H- bond donor ( 5) | 1 |
| H – bond acceptor (<10) | 4 |
| Violation | 0 |
| **L39** | -6.9 | Molecular weight ( **<** 500Da) | 287 |
| Log P ( < 5) | 3.28 |
| H- bond donor ( 5) | 1 |
| H – bond acceptor (<10) | 5 |
| Violation | 0 |
| **L40** | -7.1 | Molecular weight ( **<** 500Da) | 356 |
| Log P ( < 5) | 3.38 |
| H- bond donor ( 5) | 2 |
| H – bond acceptor (<10) | 6 |
| Violation | 0 |
| **L41** | -6.9 | Molecular weight ( **<** 500Da) | 368 |
| Log P ( < 5) | 3.36 |
| H- bond donor ( 5) | 2 |
| H – bond acceptor (<10) | 6 |
| Violation | 0 |
| **L41** | -6.9 | Molecular weight ( **<** 500Da) | 254 |
| Log P ( < 5) | 2.13 |
| H- bond donor ( 5) | 1 |
| H – bond acceptor (<10) | 4 |
| Violation | 0 |
| **L42** | -6.6 | Molecular weight ( **<** 500Da) | 356 |
| Log P ( < 5) | 3.38 |
| H- bond donor ( 5) | 2 |
| H – bond acceptor (<10) | 5 |
| Violation | 0 |
| **L43** | -7.9 | Molecular weight ( **<** 500Da) | 446 |
| Log P ( < 5) | 2.87 |
| H- bond donor ( 5) | 1 |
| H – bond acceptor (<10) | 7 |
| Violation | 0 |
| **L44** | -6.5 | Molecular weight ( **<** 500Da) | 358 |
| Log P ( < 5) | 2.90 |
| H- bond donor ( 5) | 3 |
| H – bond acceptor (<10) | 6 |
| Violation | 0 |
| **L45** | -6 | Molecular weight ( **<** 500Da) | 380 |
| Log P ( < 5) | 3.58 |
| H- bond donor ( 5) | 2 |
| H -bond acceptor (<10) | 6 |
| Violation | 0 |
| **L46** | -7 | Molecular weight ( **<** 500Da) | 276 |
| Log P ( < 5) | 4.03 |
| H- bond donor ( 5) | 1 |
| H – bond acceptor (<10) | 3 |
| Violation | 0 |
| **L47** | -5.8 | Molecular weight ( **<** 500Da) | 372 |
| Log P ( < 5) | 3.20 |
| H- bond donor ( 5) | 1 |
| H – bond acceptor (<10) | 3 |
| Violation | 0 |
| **L48** | -5.8 | Molecular weight ( **<** 500Da) | 312 |
| Log P ( < 5) | 4.31 |
| H- bond donor ( 5) | 1 |
| H – bond acceptor (<10) | 3 |
| Violation | 0 |
| **L49** | -6.9 | Molecular weight ( **<** 500Da) | 302 |
| Log P ( < 5) | 3.33 |
| H- bond donor ( 5) | 1 |
| H – bond acceptor (<10) | 5 |
| Violation | 0 |
| **L50** | -6 | Molecular weight ( **<** 500Da) | 452 |
| Log P ( < 5) | 3.80 |
| H- bond donor ( 5) | 0 |
| H – bond acceptor (<10) | 8 |
| Violation | 0 |

**Molecular Dynamics (MD)**

Molecular dynamic (MD) simulations were performed on the most stable pose obtained from the docking studies using CHARMM force-field [1, 2] in NAMD [3] while VMD [4] program was utilized for analyzing RMSD and RMSF. We used aqueous media and also performed neutralization by adding 4Na+ by autoionize option in VMD before performing MD simulations. Simulations were carried out for 120 ns. Before the equilibration, whole system (water, ions, ligand and the protein) were minimized for 10000 steps. Equilibration was carried out for 1 ns at normal pressure (1 atm) and temperature (310 K). We used high-performance computing facility at King Abdullah University of Science & Technology (KAUST) in Thuwal, Saudi Arabia for NAMD calculations. Details about Periodic boundary conditions for apo form and complexes are as follow:

**# Periodic boundary condition for apo-form (ERα):**

cellBasisVector1 67.30299854278564 0 0

cellBasisVector2 0 71.11899948120117 0

cellBasisVector3 0 0 71.83600044250488

cellOrigin 26.69800567626953 7.414976596832275 22.594812393188477

**# Periodic Boundary conditions for L2 complex:**

cellBasisVector1 52.31199860572815 0 0

cellBasisVector2 0 56.12399864196777 0

cellBasisVector3 0 0 56.85100173950195

cellOrigin 22.579082489013672 5.342835903167725 21.66787338256836

**# Periodic boundary condition for L8 complex:**

cellBasisVector1 67.30299854278564 0 0

cellBasisVector2 0 71.11899948120117 0

cellBasisVector3 0 0 71.83600044250488

cellOrigin 26.704208374023438 7.407166481018066 22.590261459350586

Solvated and ionized forms of ERα and ligand complexes (L2 and L8) while performing MD simulations are given below in Fig. S20 and Fig. S21.


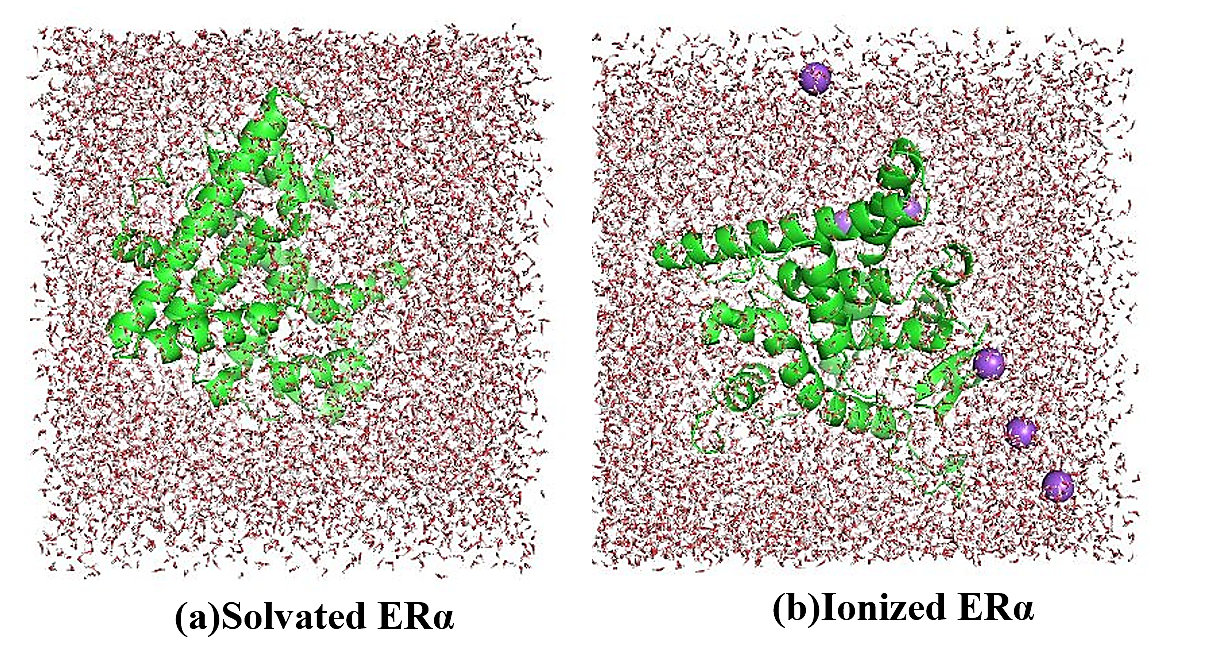

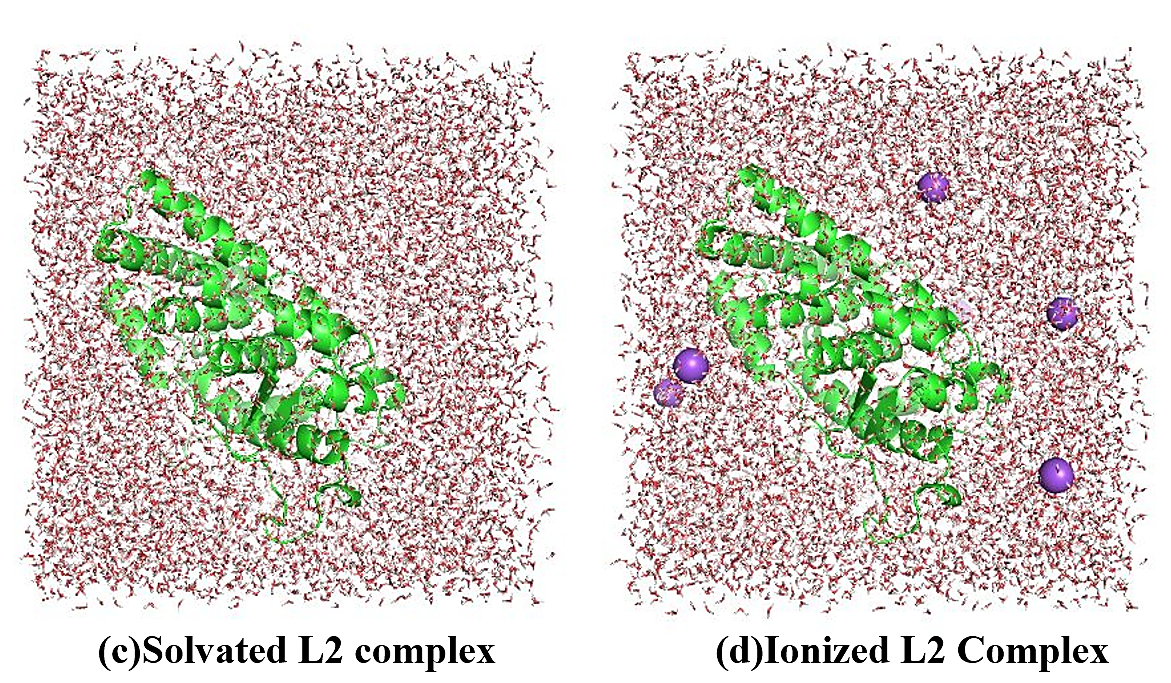


**Fig. S20*.*** Solvated and ionized forms of ERα (a and b) and L2 complex (c and d) while performing MD simulations.

**Fig. S21:** Solvated and ionized forms of L8 complex (a and b) while performing MD simulations.


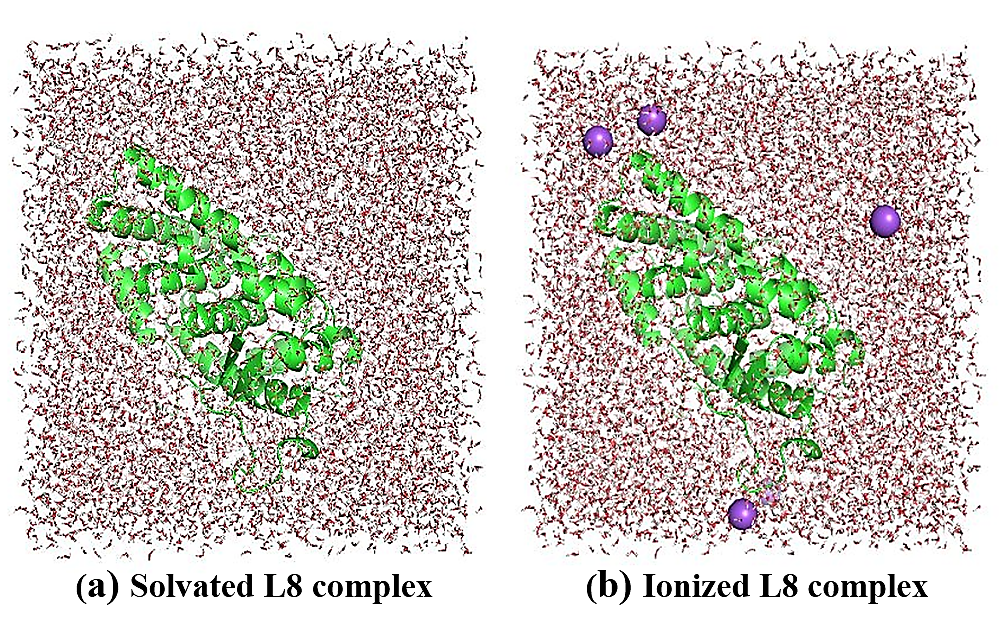


**References**

[1] Best, R.B., et al., *Optimization of the additive CHARMM all-atom protein force field targeting improved sampling of the backbone ϕ, ψ and side-chain χ1 and χ2 dihedral angles.* Journal of chemical theory and computation, 2012. **8**(9): p. 3257-3273.

[2] Best, R., N. Caulk, and J.J. Stachowicz, *Trait vs. phylogenetic diversity as predictors of competition and community composition in herbivorous marine amphipods.* Ecology Letters, 2013. **16**(1): p. 72-80.

[3] Bar-On, Y.M., et al., *Science Forum: SARS-CoV-2 (COVID-19) by the numbers.* Elife, 2020. **9**: p. e57309.

[4] Humphrey, W., A. Dalke, and K. Schulten, *VMD: visual molecular dynamics.* Journal of molecular graphics, 1996. **14**(1): p. 33-38.
